RESEARCH ARTICLE

# Epicatechin modulates stress-resistance in *C. elegans* via insulin/IGF-1 signaling pathway

Begoña Ayuda-Durán<sup>1</sup>, Susana González-Manzano<sup>1</sup>, Antonio Miranda-Vizuete<sup>2</sup>, Montserrat Dueñas<sup>1</sup>, Celestino Santos-Buelga<sup>1\*</sup>, Ana M. González-Paramás<sup>1</sup>

**1** Grupo de Investigación en Polifenoles, Universidad de Salamanca, Campus Miguel de Unamuno, Salamanca, Spain, **2** Instituto de Biomedicina de Sevilla, Hospital Universitario Virgen del Rocío/CSIC/Universidad de Sevilla, Sevilla, Spain

\* [csb@usal.es](mailto:csb@usal.es)

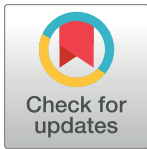

**OPEN ACCESS**

**Citation:** Ayuda-Durán B, González-Manzano S, Miranda-Vizuete A, Dueñas M, Santos-Buelga C, González-Paramás AM (2019) Epicatechin modulates stress-resistance in *C. elegans* via insulin/IGF-1 signaling pathway. PLoS ONE 14(1): e0199483. <https://doi.org/10.1371/journal.pone.0199483>

**Editor:** Kyung-Jin Min, Inha University, REPUBLIC OF KOREA

**Received:** June 5, 2018

**Accepted:** January 11, 2019

**Published:** January 28, 2019

**Copyright:** © 2019 Ayuda-Durán et al. This is an open access article distributed under the terms of the [Creative Commons Attribution License](https://creativecommons.org/licenses/by/4.0/), which permits unrestricted use, distribution, and reproduction in any medium, provided the original author and source are credited.

**Data Availability Statement:** All relevant data are within the paper and its Supporting Information files.

**Funding:** This work was funded by MINECO (Spanish National Projects AGL2015-64522-C2 to CS-B and BFU2015-64408-P to AM-V) and FEDER-Interreg España-Portugal Programme (Ref. 0377\_IBERPHENOL\_6\_E). Author BA-D is recipient of a PhD fellowship from the Junta de Castilla y Leon (Orden EDU/310/2015). The

## Abstract

The nematode *Caenorhabditis elegans* has been used to examine the influence of epicatechin (EC), an abundant flavonoid in the human diet, in some stress biomarkers (ROS production, lipid peroxidation and protein carbonylation). Furthermore, the ability of EC to modulate the expression of some key genes in the insulin/IGF-1 signaling pathway (IIS), involved in longevity and oxidative or heat shock stress response, has also been explored. The final aim was to contribute to the elucidation of the mechanisms involved in the biological effects of flavonoids. The results showed that EC-treated wild-type *C. elegans* exhibited increased survival and reduced oxidative damage of biomolecules when submitted to thermal stress. EC treatment led to a moderate elevation in ROS levels, which might activate endogenous mechanisms of defense protecting against oxidative insult. The enhanced stress resistance induced by EC was found to be mediated through the IIS pathway, since assays in *daf-2*, *age-1*, *akt-1*, *akt-2*, *sgk-1*, *daf-16*, *skn-1* and *hsf-1* loss of function mutant strains failed to show any heat-resistant phenotype against thermal stress when treated with EC. Consistently, EC treatment upregulated the expression of some stress resistance associated genes, such as *gst-4*, *hsp-16.2* and *hsp-70*, which are downstream regulated by the IIS pathway.

## Introduction

Flavan-3-ols, such as epicatechin (EC), catechin (C) and their oligomers, the procyanidins, represent a major class of secondary polyphenolic plant metabolites. Flavan-3-ols are among the most abundant flavonoids in the human diet and are mainly present in fruits, tea, cocoa and red wine. These compounds have been reported to exhibit a range of biochemical and pharmacological activities [1], although their precise mechanisms of action have not been yet elucidated. Traditionally it has been assumed that antioxidant and radical scavenging properties underlay their action mechanism, but currently it is not clear whether other pathways contribute to their overall effect and could be even more important than the radical scavenging properties [2].

fundamental role in study design, data collection and analysis, decision to publish, or preparation of the manuscript.

**Competing interests:** The authors have declared that no competing interests exist.

Aging is a degenerative process that is receiving increasing attention in recent years. The latest theories suggest that aging is in fact a multifactorial process that is often associated with an increase of oxidative stress leading to cellular damage, as well as by gene mutation due to developmental, genetic and environmental factors [3, 4, 5]. Oxidative stress is an imbalanced state that results from the production of excessive quantities of reactive oxygen species (ROS) mostly generated during cellular respiration, leading to an accumulation of oxidative damage in a variety of biomacromolecules, such as enzymes, proteins, DNA, and lipids [6]. On the other hand, ROS have been found to be physiologically vital for signal transduction, gene regulation and redox regulation among others, implying that their complete elimination would be harmful [7]. Besides, some authors even have proposed the term mitohormesis to describe the response to mitochondrial ROS. While hormesis refers to a biphasic dose response to an environmental agent or chemical agent characterized by a low dose adaptive beneficial effect and a high dose toxic effect, the mitohormesis would be the hormetic reaction in response to mitochondrial ROS, by which a high but sub-lethal level of free radical production that can stimulate resistance to ROS damage and ultimately increase longevity [8].

*Caenorhabditis elegans* is a simple multicellular organism that constitutes an excellent model for studying mechanisms of aging because of its short lifespan, fast generation time, good molecular and genomic tools and well-defined genetic pathways [9, 10]. Furthermore, *C. elegans* molecular and cellular pathways are strongly conserved in relation to mammals, including humans. Comparison between human and *C. elegans* genomes confirmed that many of human genes and pathways involved in disease development are present in the worm [11]. Thus, the use of *C. elegans* offers promising possibilities for studying the influence of secondary plant compounds like flavonoids on the process of aging and human health [2].

The aging, metabolism and stress resistance processes are regulated by an environmental conserved insulin/IGF-I signaling (IIS) pathway (Fig 1) [3, 12].

Components of this pathway are candidate targets, which could provide a powerful entry point for understanding the causes of aging at the molecular level. The IIS pathway consists of DAF-2, a receptor tyrosine kinase that gets phosphorylated upon stimulation by insulin-like peptides (ILPs) and promotes the activation of a phosphatidylinositol 3-kinase signaling cascade that culminates in the phosphorylation and inactivation of DAF-16/FOXO transcription factor by promoting its nucleus-cytosol translocation [13, 14]. The inhibition of the IIS pathway by an increased DAF-18/PTEN activity, stress or reduced DAF-2 activity, leads to nuclear translocation and activation of DAF-16/FOXO, where it changes the expression of various genes. DAF-16/FOXO interacts with other transcription factors such as HSF-1 and SKN-1 that are also affected by DAF-2 [15]. These transcription factors, in turn, regulate the expression of many genes such as catalase (*ctl-1*), superoxide dismutase-3 (*sod-3*), metallothionein (*mtl-1*), bacterial pathogen defense genes (*lys-7*, *spp-1*), molecular chaperones, e.g., small heat shock protein-16.2 (*hsp-16.2*) and glutathione S-transferase (*gst-4*). All of them key factors that contribute to lifespan, stress tolerance, response to pathogenic bacteria and protein misfolding suppression [16–19].

Therefore, mutations in DAF-2 or any of the other downstream signaling components produce the downregulation or inhibition of IIS signaling in *C. elegans* and cause several cytoprotective phenotypes, such as stress resistance (oxidative stress, thermal stress), increased pathogen resistance and long lifespan [9]. In the case of *daf-2* mutants the lifespan of the animal is increased more than double and the most remarkable issue about these (and many other) long-lived mutants is that they remain young and healthy long after wild type worms are old and decrepit [4]. Previous studies have shown that different phenolic compounds such as acacetin [20], quercetin [21, 22], epicatechin [23], epigallocatechin-3-O-gallate (EGCG) [24] or myricetin [25], seem to have an influence in this pathway and/or have the ability to prolong lifespan or attenuate oxidative stress.

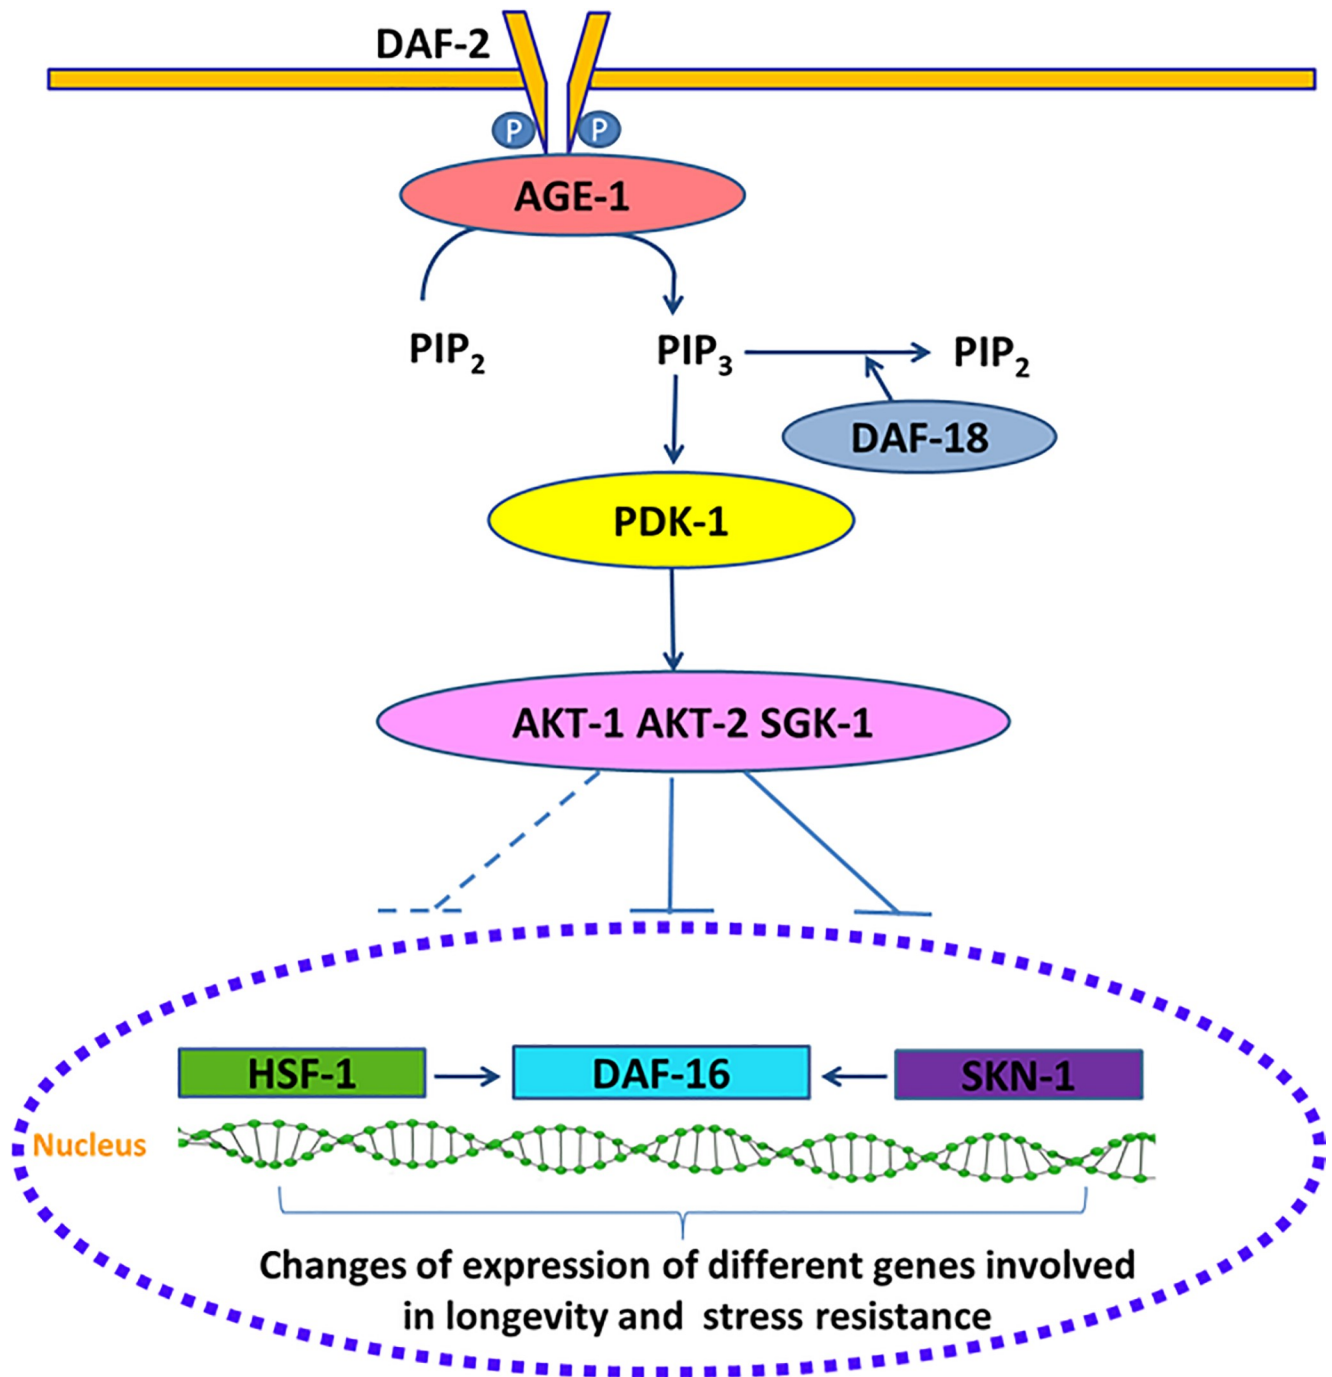

Fig 1. Scheme of *C. elegans* IIS pathway.

<https://doi.org/10.1371/journal.pone.0199483.g001>

In this work, besides the study of the influence of EC in the biochemical changes on wild type *Caenorhabditis elegans*, genetic analyses within a series of worm mutants of the IIS pathway (*daf-2*, *age-1*, *daf-16*, *akt-1*, *akt-2*; *sgk-1*, *hsf-1*, *skn-1*) have been carried out in order to evaluate the effects of EC on oxidative resistance. Additionally, the expression of some of these stress resistance associated genes, such as *daf-16*, *skn-1*, *hsf-1*, *hsp-16.2*, *hsp-70*, *sod-3* and *gst-4* has been determined by quantitative real-time PCR or using transgenic strains expressing

fluorescent reporters. The aim of these studies is to gain further insight into the mechanisms involved in the effects of EC in aging.

## Material and methods

### Standards and reagents

(-)-Epicatechin (EC), 2'-7'-dichlorofluorescein diacetate (DCFH-DA), ampicillin sodium salt, nistatine, agar, yeast extract, fluorodeoxyuridine (FUdR), phosphate-buffered saline (PBS), cholesterol, Bradford reagent, guanidine hydrochloride (GuHCl), 2,4-dinitrophenylhydrazine (DNPH), malondialdehyde, hexanal, hexenal and 4-HNE were purchased from Sigma-Aldrich (Madrid, Spain). Dimethyl sulfoxide (DMSO) was obtained from Panreac (Barcelona, Spain) and trichloroacetic acid from Fluka Analytical (Madrid, Spain). HPLC grade acetonitrile was from Carlo Erba (Rodano, Italy). Acetic acid was from Merck (Darmstadt, Germany). Fluorescein thiosemicarbazide was from Carbosynth (Berkshire, UK)

### Strains and maintenance conditions

The wild type strain N2 and the mutant strains CB1270, *daf-2* (e1370) III; TJ1052, *age-1* (hx546) II; CF1038, *daf-16*(mu86) I; CB1375, *daf-18*(e1375) IV; BQ1, *akt-1*(mg306) V; KQ1323, *akt-2*(tm812) *sgk-1*(ft15) X; PS3551, *hsf-1*(sy441) I; EU1, *skn-1*(zu67) IV/*nT1*[*unc-? (n754)let-?*] (IV;V); CF1553, *mul84* [(*Psod-3::gfp*)]; TJ356, *zIs356* [*Pdaf-16::daf-16::gfp; rol-6 (su1006)*] IV; CL2166, *dvIs19* [(*Pgst-4::gfp::NLS; rol-6 (su1006)*] III; AM446, *rmIs223* [*Phsp70::gfp; rol-6(su1006)*]; CL2070, *dvIs70* [*Phsp-16.2::gfp; rol-6 (su1006)*], as well as the *E. coli* OP50 bacterial strain were obtained from the *Caenorhabditis* Genetics Center at the University Minnesota (Minneapolis, USA). Worms were routinely propagated at 20°C on nematode growth medium (NGM) plates with OP50 as a food source.

Synchronization of worm cultures was achieved by treating gravid hermaphrodites with bleach:NaOH 5N (50:50). Eggs are resistant whereas worms are dissolved in the bleach solution. The suspension was shaken with vortex during one min and kept a further minute on rest; this process was repeated five times. The suspension was centrifuged (2 min, 9500 g). The pellet containing the eggs was washed six times with an equal volume of buffer M9 (3 g KH<sub>2</sub>PO<sub>4</sub>, 6 g Na<sub>2</sub>HPO<sub>4</sub>, 5 g NaCl, 1 mL 1 M MgSO<sub>4</sub>, H<sub>2</sub>O to 1 L). Around 100 to 300 µL of the M9 with eggs (depending on eggs concentration) were transferred and incubated on NGM agar plates with or without EC. When the worms reached the L4 stage they were transferred to new plates with or without EC but also containing FUdR at a concentration of 150 µM to prevent reproduction and progeny overgrowth. The worms were transferred every 2 days to fresh plates with FUdR for the different treatments (with or without EC) until they reached the day of the assay. Epicatechin solution (200 mM) in DMSO was added to the nematode growth medium during its preparation to get a 200 µM final concentration on the plates. Control plates were also prepared without the flavonoid but containing the same volume of DMSO (0.1% DMSO, v/v).

In order to evaluate if the age of the worm had an influence, the different assays were carried out at different aging stages as described below.

### Stress assays

Oxidative stress in worms was induced by subjecting the animals to 35°C heat-shock treatment. Worms were incubated on OP50 plates with or without EC until days 10 and 17 of adulthood for wild type worms, and days 2 and 9 of adulthood in mutant worms. Then they were transferred with a platinum wire to agar plates (Ø 35 mm, 20 worms per plate) and

switched to 35°C for 6 or 8 h. The time was decided depending on the thermotolerance of the specific strain used in the assay. After that time, dead and alive nematodes were counted. Assays were performed with approximately 100 nematodes per treatment. In all mutant assays, in addition to the mutant control a parallel control using wild type worms was also included. In all cases, three independent experiments were performed. The relative rates of survival of worms after being subjected to thermal stress were expressed in relation to the untreated controls.

### Determination of reactive oxygen species (ROS)

The accumulation of ROS was evaluated periodically every two days from the 2<sup>nd</sup> day to the 17<sup>th</sup> day of adulthood in worms cultivated in presence and absence of EC. The cellular ROS were quantified by the dichlorofluorescein assay [26]. Briefly, the worms were individually transferred to a well of a 96-well plate containing 75  $\mu$ L of PBS and then exposed or not to thermal stress (2 h at 35°C), after which 25  $\mu$ L of DFCH-DA 150  $\mu$ M solution in ethanol was added to each well. The acetate groups of DFCH-DA were removed in worm cells, and the released DFCH is oxidized by intracellular ROS to yield the fluorescent dye DCF. The fluorescence from each well was measured immediately after incorporation of the reagent and every 10 minutes for 30 minutes, using 485 and 535 nm as excitation and emission wavelengths, respectively. Recording of the DCF fluorescence intensity with time in single worms was used as an index of the individual intracellular levels of ROS. Five independent experiments were performed per treatment, and for each experiment ROS measurements were made in at least 24 individual worms. The measurements were performed in a microplate reader (FLUOstar Omega, BMG labtech).

### Worm homogenates

Worms were grown on NMG medium until the 10<sup>th</sup> and 17<sup>th</sup> day of adulthood. Then, they were subjected to thermal stress for 5 h at 35°C and subsequently, for each assay, animals from two plates ( $\varnothing$  100 mm) were collected to a flask and resuspended in M9 buffer. Suspensions were centrifuged (12,000 g, 5 min), and the worm pellet was washed with PBST (PBS + 0.01% Tween 20) twice and finally with PBS. The remaining pellet was transferred to an Eppendorf tube, resuspended in 1000  $\mu$ L of PBS, and kept at -20°C. Next, samples were stirred (Genius 3 vortex) and sonicated once during 60 s and twice for 30 s in a Cell Disruptor (Microson XL2000 100) to obtain a homogenate. For each treatment three independent experiments were performed, and in each experiment the measurements of the different variables were made in triplicate using three different worm homogenates. The protein content was determined according to the Bradford method after digestion of the homogenate [27]. The carbonylated proteins and lipid peroxidation products were further normalized to protein content to correct for differences in biomass of the different homogenates.

### Determination of lipid peroxidation products

Lipid peroxidation products were analyzed by HPLC after derivatization with 2,4-dinitrophenylhydrazine (DNPH) based on the method described by Andreoli et al. [28]. Proteins were removed from worm homogenates (350  $\mu$ L) by adding 350  $\mu$ L of 20% (v/v) trichloroacetic acid; 100  $\mu$ L of butylhydroxytoluene 10 mM dissolved in methanol was also added in order to protect the lipids. After a 15 min incubation at 4°C, samples were centrifuged at 10,000 g for 10 min at 4°C. The supernatant was mixed with 100  $\mu$ L of 10 mM DNPH in 2M HCl and incubated for 60 min at room temperature. The mixture was extracted three times with 400  $\mu$ L of chloroform and 3 pieces of molecular sieves were added to the organic phase for 30 min in order to remove possible remains of aqueous phase. The organic phase was collected and

concentrated to dryness and finally resuspended in 80  $\mu$ L of acetic acid 0.2%: acetonitrile (62:38, v/v) and injected in the HPLC system. The column was a Waters Spherisorb S3 ODS-2 C8, 3  $\mu$ m (4.6 x 150 mm) and the solvents were: (A) 0.2% acetic acid, and (B) acetonitrile. The elution gradient established was: isocratic 38% B for 10 min, 38% to 75% B over 10 min, 75% to 80% B over 20 min at a flow rate of 0.6 mL/min. Malondialdehyde, 4-hydroxynonenal and cis-hexenal were used as lipid peroxidation markers. Double online detection was carried out in a DAD using 310 nm and 380 nm as preferred wavelengths, and in a mass spectrometer for compound confirmation. MS detection was performed in negative ion mode in an equipment provided by an APCI source and a triple quadrupole-ion trap mass analyzer. The APCI temperature was set at 450°C. Lipid peroxidation products were quantified from their chromatographic peaks recorded in the DAD by comparison with calibration curves obtained by injection of increasing concentrations of malondialdehyde (310 nm), hexenal and 4-hydroxynonenal (HNE) (380 nm).

### Determination of carbonylated proteins

Carbonylated proteins were determined by a direct reaction of protein carbonyls with fluorescein thiosemicarbazide (FTC) [29] and measured in a fluorescent semi-microplate assay. A 50  $\mu$ L of 0.2 mM of FTC was added to 50  $\mu$ L of homogenate and kept overnight. Proteins were precipitated by adding 400  $\mu$ L 20% trichloroacetic acid and centrifuged 10,000 g 4°C 10 min. Afterwards, the precipitate was cleaned three times with 1 mL acetone, stirred (Genius vortex) and centrifuged for 10 min at 10,000 g 4°C. The precipitates were dried and finally solubilized with 50  $\mu$ L of 6M guanidine hydrochloride (GuHCl). The samples were diluted with 450  $\mu$ L Hepes buffer 0.1 M pH 7 (1.38 g NaH<sub>2</sub>PO<sub>4</sub>·H<sub>2</sub>O dissolved in 100 mL of water) and measured using 100  $\mu$ L per well in triplicate in a fluorescent reader with excitation at 485 nm and emission at 520 nm. Nanomol of FTC-reacted carbonyls were calculated using a standard curve generated from the readings of various concentrations of FTC prepared in a medium similar to the one used in the samples. The levels of protein carbonyls in the homogenates were expressed as nmol/mg worm protein calculated by the Bradford method.

### RT-qPCR assays

Adult worms were treated with or without 200  $\mu$ M of EC for 4 days. The worms were collected with M9 buffer, centrifuged at 10,000 g 1 min, and the pellet dissolved in 300  $\mu$ L of M9. Total RNA was extracted using RNeasy Mini RNA Isolation Kit (GE Healthcare). In order to maximize cell breakage, in the first stage of the extraction 10 stainless steel beads (2 mm) were added. The mixture was vortex shaken vigorously and further homogenized in a Thermo Savant FastPrep 120 Cell Disrupter System with a speed of 5.5 m/s and run time duration of 10 s five times. cDNA was produced with High Capacity cDNA Reverse Transcription Kits (Applied Biosystems) using a 2  $\mu$ g of total RNA per reaction. The expression of mRNA was assessed by quantitative real-time PCR, using SYBR green as the detection method. The gene expression data were analyzed using the comparative 2- $\Delta\Delta$ Ct method with *act-1* as the normalizer [30]. Nine independent experiments were performed. The following gene-specific primers were used: *act-1* CCAGGAATTGCTGATCGTATG (F) and GGAGAGGGAAGCGAGGATAG (R), *skn-1* AGTGTCTGGCGTTCCAGATTTTC (F) and GTCGACGAATCTTGCGAATCA (R), *daf-16* CCAGACGGAAGGCTTAAACT (F) and ATTCGCATGAAACGAGAATG (R), *ctl-1* AATGGATACGGAGCGCATAAC (F) and TCCTGTTTCAGCACCATCTTG (R), *gst-7* GACAGCTTCCACTCCTTGAA (F) and GCACACTTTCATTGATTCC (R), and *hsf-1* GAAATGTTTTGCCGCATTTT (F) and CCTTGGGACAGTGGAGT CAT (R).

## Fluorescence quantification and visualization

Synchronized L1 larvae expressing an inducible green fluorescent protein (GFP) reporter for *gst-4*, *hsp-16.2*, *hsp-70*, *sod-3* and *daf-16* genes were grown on NMG medium in the presence or absence of EC until the day of the assay, when they were submitted or not to thermally-induced oxidative stress (35°C, 1h). The precise day of assay was defined when a higher intensity of the fluorescence was observed after carrying out a screening with the different strains throughout the life of the worm. If no increase in the fluorescence was observed, young (day 2<sup>th</sup> of adulthood) and older adult worms (day 9<sup>th</sup> of adulthood) were exposed to the heat shock. In the cases of *hsp-16.2* and *hsp-70* reporter strains, worms were then allowed to recover in their normal environment at 20°C for 2h or 3h, respectively before pictures were taken. The expression of *gst-4*, *hsp-16.2*, *hsp-70*, *sod-3* was measured by quantifying the fluorescence of the GFP reporter. To analyze the subcellular localization of DAF-16::GFP, worms were classified as diffuse cytoplasmic, intermediate cytoplasmic/nuclear and strong nuclear translocation. Approximately 35 randomly selected worms for each experiment were mounted in a 5 µL drop of 10 mM levamisole (except for DAF-16::GFP in 2% sodium azide) on a 3% agarose pad covered with a coverslip. All fluorescence determinations were done in an Olympus BX61 fluorescence microscope equipped with a filter set (excitation 470±20 nm, emission 500±20 nm) and a DP72 digital camera coupled to CellSens Software for image acquisition and analysis. ImageJ software was used to quantify fluorescence intensity. Three independent experiments were performed per assay and reporter strain.

## Statistical analysis

The statistical analyses were performed using the PC software package SPSS (version 23.0; SPSS Inc., Chicago). ANOVA was applied for multiple comparisons of values to determine possible significant differences between treated and control groups. To analyze survival to thermal stress, contingency tables were performed and Statistical significance was calculated using the Chi Square Test. In every analysis, significant differences were statistically considered at the level of  $p < 0.05$ .

## Results and discussion

### Effects of epicatechin (EC) in stress resistance

In a previous work, the effects of catechin, epicatechin, 3'-O-methylepicatechin and 4'-O-methylepicatechin in *C. elegans* stress resistance were evaluated [31]. All the assayed catechins enhanced the resistance of the worm against both thermal and chemically-induced oxidative stress in early adult stages (worms at 1<sup>st</sup> and 6<sup>th</sup> day of adulthood), with relatively greater protective effects in older (6<sup>th</sup> day) than in young worms. Specifically, a significant enhancement in survival was observed following thermal stress in the EC-treated nematodes (200 µM).

In the present work, the influence of EC in worm resistance to thermal stress was evaluated in more aged animals (10<sup>th</sup> and 17<sup>th</sup> day of adulthood), in order to know if the age of the animals and/ or a longer exposure time to EC further influenced the resistance against this type of stress. As shown in Fig 2, the treatment with EC resulted in a significant increase in the survival of nematodes subjected to thermal stress (8h, 35°C). At day 10, the survival of stressed animals increased from 29.9% in controls to 47.7% in worms treated with EC. Likewise, the treatment with EC increased the survival rates at day 17 from 40% in controls to 55% in worms treated with EC. These results suggest that the protective effect of EC against heat stress is not increased in more aged worms, as previously concluded [31]. Nevertheless, caution must be observed when interpreting these data as this aged population (10<sup>th</sup> and 17<sup>th</sup> days of

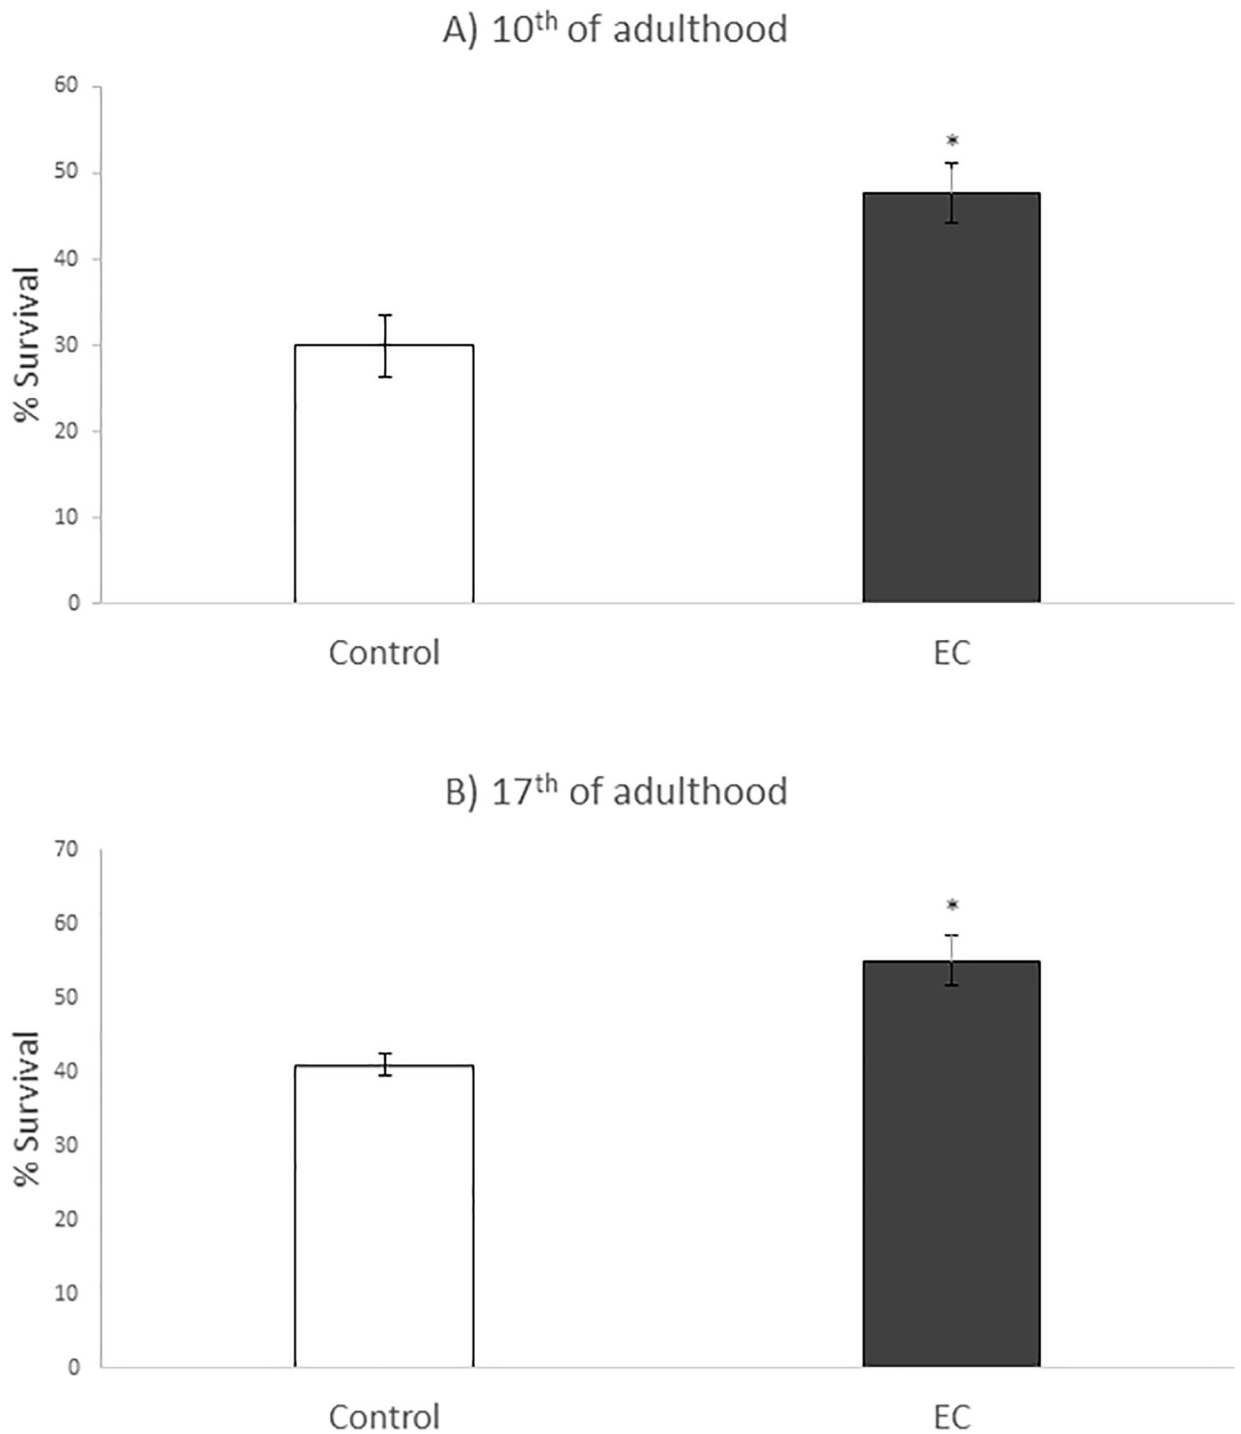

**Fig 2.** Percentages of survival following thermal stress (35°C, 8h) applied at days 10<sup>th</sup> (A) and 17<sup>th</sup> of adulthood (B) in N2 wild type *C. elegans* strain not treated (controls) and treated with EC (200 µM in the culture media). Three independent experiments were performed. The results are presented as the mean values ± SD. Statistical significance was calculated using the Chi Square Test. The differences were considered significant at \* ( $p < 0.05$ ).

<https://doi.org/10.1371/journal.pone.0199483.g002>

adulthood) represents the more aging resistant phenotypes, a circumstance that might provide a special relevance to the increase in the percentage of survival induced by EC in older individuals.



## Effects of EC in intracellular ROS levels

Intracellular ROS were determined in *C. elegans* grown in NGM media with and without EC (200  $\mu$ M) and exposed or not to thermal stress (35°C, 2h). ROS assessment was performed every two or three days throughout the life of the worms and the obtained results are shown in Fig 3.

As expected, a progressive increase in ROS levels was produced as the animals grows older and higher ROS levels were found in thermally stressed animals than in those not subjected to stress. Regarding the effect of EC, a different behavior was observed between younger and older individuals. Thus, up to day 9 of adulthood, similar or slightly lower ROS levels were determined in animals treated with EC than in non-treated controls. This observation was in agreement with previous studies where *C. elegans* was grown with and without EC up to the sixth day of adulthood [23]. However, from day 9 onwards this trend was inverted and higher ROS values were determined in worms grown in the presence of EC than in their corresponding controls, either submitted or not to thermal stress. In previous studies on the influence of EC in *C. elegans* longevity [31], an increase in the survival rate was observed in the worms treated with EC from day 14<sup>th</sup> onwards, which approximately coincides with the time point where ROS levels become higher in the individuals treated with EC in both populations in the assays now performed (Fig 3).

The physiological effects of ROS levels within an organism remains unresolved. According to the free radical theory of aging [32], the cause of aging is the accumulation of molecular damage due to the production of toxic ROS during cellular respiration. Nevertheless, although it is clear that oxidative damage increases with age, numerous studies have suggested that oxidative stress may not be the only cause of aging or at least not according to the classical conception [5, 33, 34]. Indeed, an increasing number of studies seem to contradict the free radical theory, including studies carried out in *C. elegans* where longer lifespan was found in worms with higher concentrations of ROS. Lee et al, [35] showed that the mild increase in ROS levels induced by the inhibition of respiration or by low paraquat levels, an oxygen free radical generating compound, activate gene expression and promote longevity whereas higher concentrations of paraquat decreased it in a dose-dependent manner. Similarly, Heidler et al, [36] observed that exposure to high concentrations of juglone, another superoxide-generating compound, led to premature worm death but low concentrations prolonged life. Based on the observations above, Van Raamsdonk and Hekimi [37] proposed that *C. elegans* lifespan resulted from a balance between ROS toxicity and pro-survival ROS-mediated signaling that can result in increased longevity.

More recently, Meng et al, [38] studied the differential responses to oxidative stress in young and old individuals using *C. elegans* and human fibroblasts. They proposed a new concept called "Redox-stress Response Capacity (RRC)", according to which cells or organisms are capable of generating dynamic redox responses to activate cellular signaling and to maintain cellular homeostasis. This response would be higher in young individuals generating more ROS and activating signaling pathways and with a better ability to degrade damaged proteins by up-regulating chaperones. That explanation might give an answer to our and others observations regarding the differential effects of EC on ROS production and *C. elegans* survival depending on worm life stage.

Taken together, and in agreement with what has been proposed by other authors [5, 36, 39], the results obtained herein seem to reinforce the emerging idea that mild increase in ROS levels may not have detrimental effects. This might involve different mechanisms, such as induction in the expression of protective cellular pathways, activation of repair mechanisms or changes in respiration.

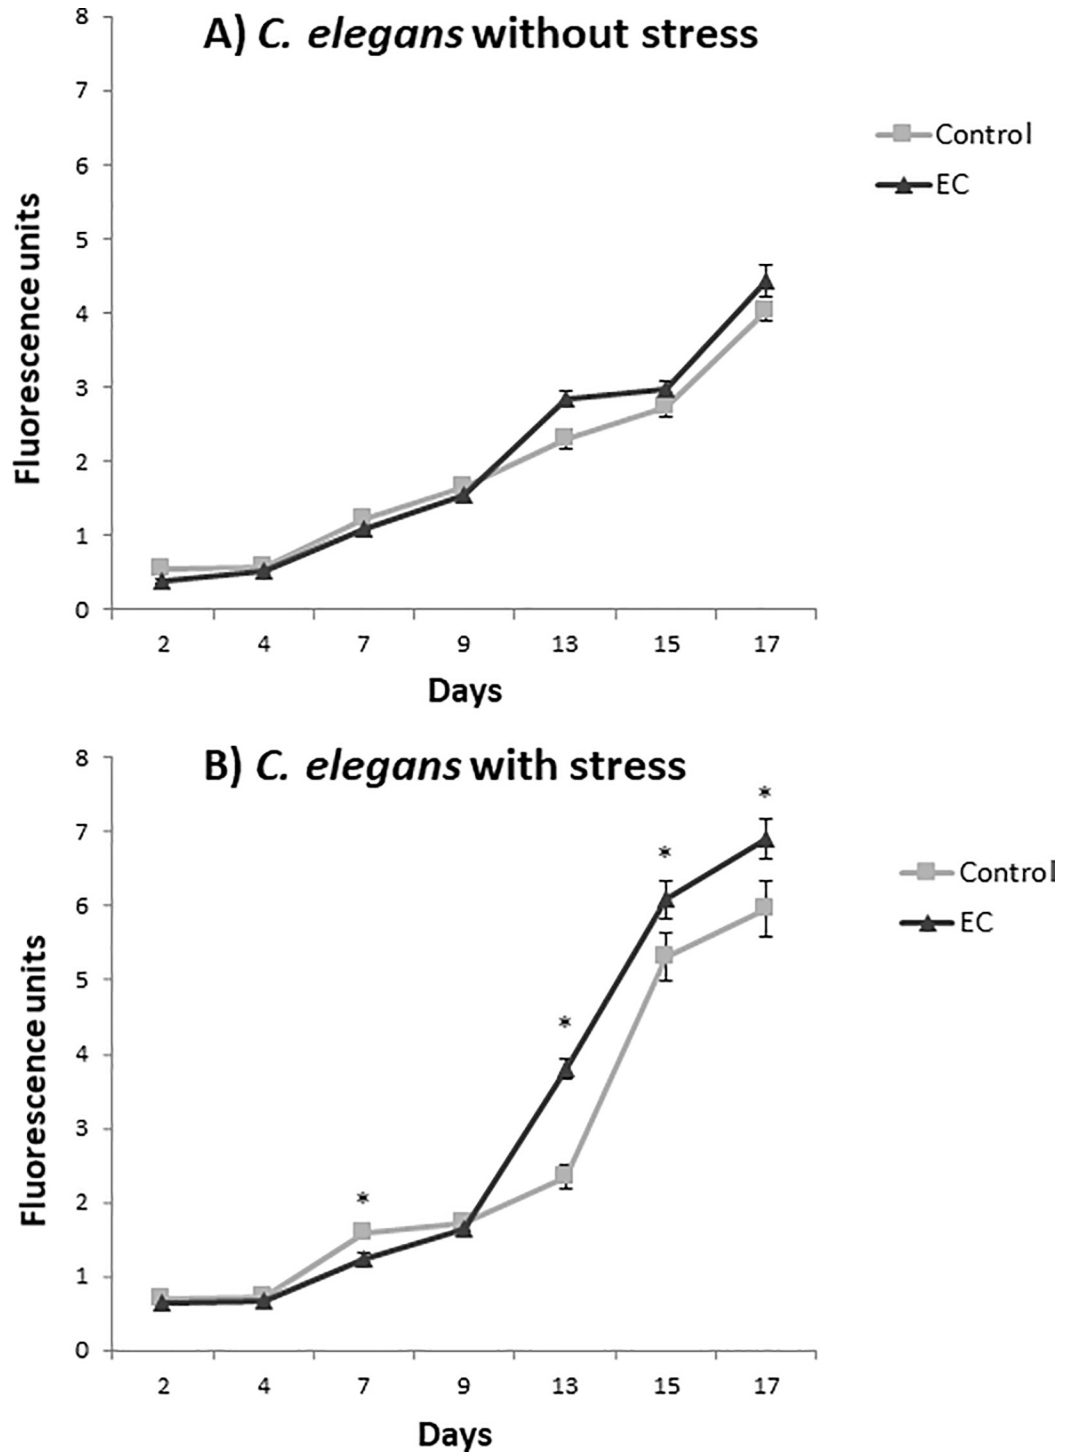

**Fig 3.** Levels of intracellular ROS in *C. elegans* subjected (B) or not (A) to thermal stress (35°C, 2h) grown in the absence (controls) or presence of EC (200 μM in the culture media). ROS levels were evaluated at different ages throughout the entire life of the worm. Five independent experiments were performed. The results are presented as the mean values ± SEM. Statistical significance was calculated using one-way analysis of variance ANOVA. The differences were considered significant at \* ( $p < 0.05$ ).

<https://doi.org/10.1371/journal.pone.0199483.g003>

### Oxidative damage: Protein carbonylation and products of lipid peroxidation

In order to evaluate whether the treatment with EC had an influence on the level of oxidative damage in *C. elegans*, carbonylated proteins and lipid peroxidation products were determined in wild type worms grown in the presence and absence of EC (200 μM) and subjected to thermal stress at 10<sup>th</sup> and 17<sup>th</sup> day of adulthood.

Carbonylated proteins are commonly used as a biomarker of protein oxidation in cells and tissues and high levels of them have been related to loss of cell viability. The oxidation status of proteins was quantified after the reaction of the carbonyl groups with fluorescein-thiosemicarbazide (FTC) adapting the method proposed by Chaudhuri et al, [29] to *C. elegans*. The results were expressed as nmol of carbonylated proteins by mg of worm protein. As shown in Fig 4A.1 and 4A.2 a slight decrease was observed in the levels of protein carbonylation in worms treated with EC both at days 10<sup>th</sup> and 17<sup>th</sup>. Although the differences were not significant ( $p > 0.05$ ), the levels of carbonylated proteins were never higher in the worms treated with EC with respect to untreated animals. This observation suggested that exposure to EC did not lead to an increase in the oxidative damage despite enhanced ROS levels were determined in treated worms than in controls (Fig 3).

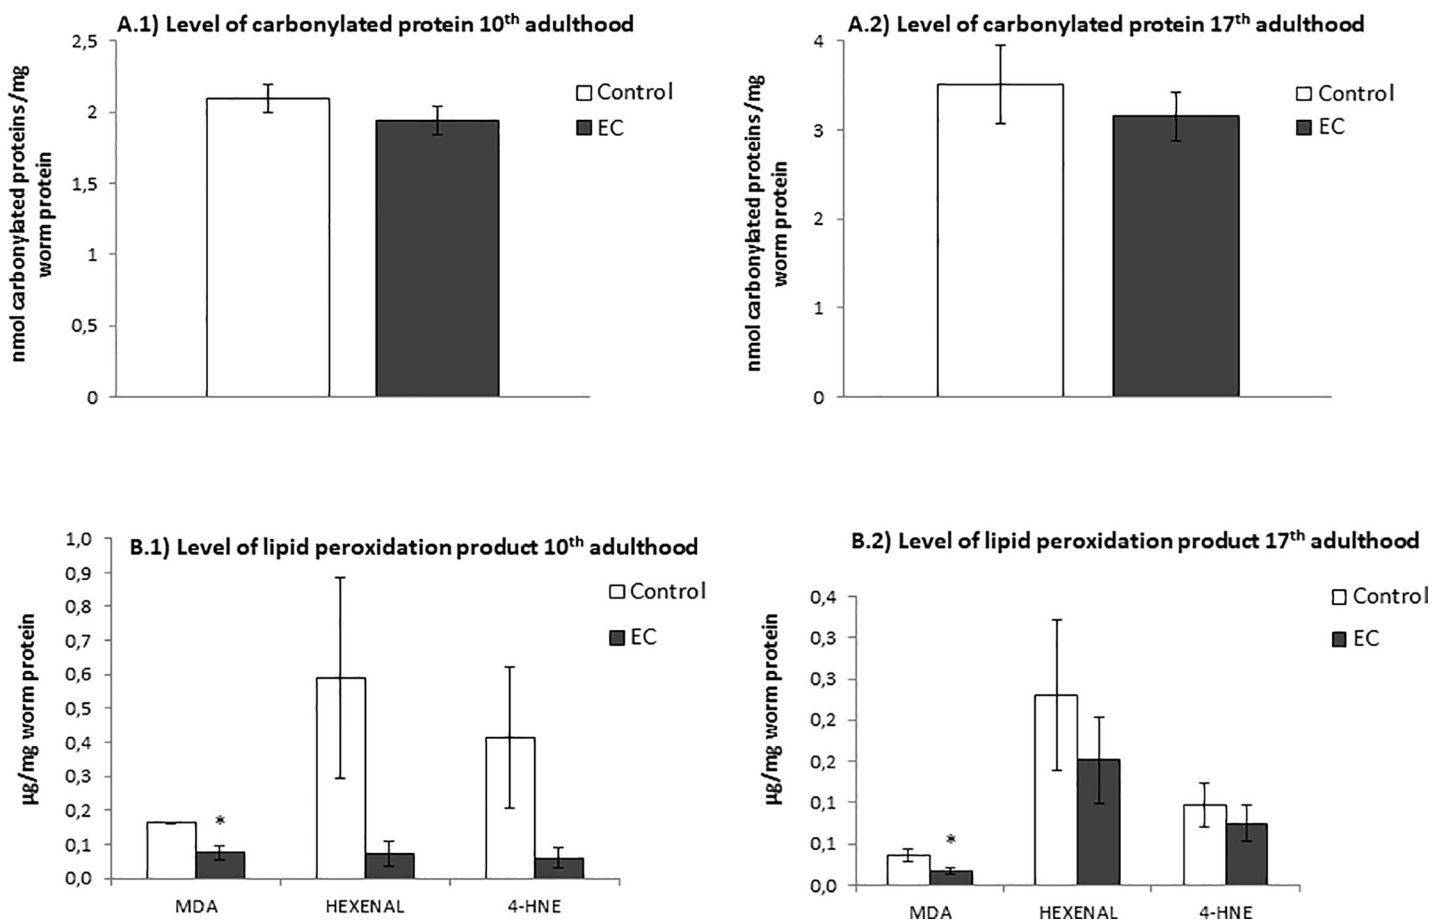

**Fig 4.** Levels of (A) carbonylated proteins and (B) lipid peroxidation products after cultivation of *C. elegans* in the absence (controls) and presence of EC (200 μM) and subjected to thermal stress. The results were obtained at days 10<sup>th</sup> (A.1 and B.1) and 17<sup>th</sup> (A.2 and B.2) of worm adulthood. Three independent experiments were performed. The results are presented as the mean values ± SEM. Statistical significance was calculated using one-way analysis of variance (ANOVA). The differences were considered significant at \* ( $p < 0.05$ ).

<https://doi.org/10.1371/journal.pone.0199483.g004>

High ROS levels may attack polyunsaturated fatty acids in membrane and free lipids leading to oxidative lipid degradation. Some common products of this process are malondialdehyde (MDA), 4-hydroxynonenal (4-HNE) and cis-hexenal, which have been used as lipid peroxidation markers in the present study. In Fig 4B.1 and 4B.2 it can be observed that a descent was produced in the levels of these peroxidation products in the worms treated with EC with respect to untreated animals in both days of the assay, although only the decline of MDA was significant. Thus, as for carbonylated proteins, the increased ROS levels determined in the worms treated with EC (Fig 3) did not result in an increase in lipid peroxidation, as evaluated by the analyzed markers.

Lipid peroxidation can cause loss of membrane integrity and subsequent cell death. Thereby, the observed decrease in lipid peroxidation might explain the longer lifespan and the increased survival rate after thermal stress in worms treated with EC. This could indicate that chronic exposure to this flavonoid confers protection against oxidative damage that would still be evident in later ages. Lapointe and Hekimi and Lapointe et al. [40] observed in long-lived *Mclk1*<sup>+/-</sup> mice, with a dysfunction in the activity of CLK-1/MCLK1 (a mitochondrial enzyme necessary for ubiquinone synthesis), a significant attenuation in the rate of development of oxidative biomarkers of aging (protein carbonylation, lipid peroxidation and 8-OHdG as a biomarker of DNA damage) despite they exhibited a substantial increase in oxidative stress. Reduced activity of CLK-1/MCLK1 has also been shown to prolong average and maximum lifespan in *C. elegans* [40].

In view of these findings, it could be suggested that the moderate increase ROS levels provoked by the treatment with EC in *C. elegans* may be beneficial, possibly by inducing the expression of protective cellular pathways, activating alternative metabolic pathways, repair mechanisms and changes in respiration. To check whether the increment in the maximum lifespan found after treatment with EC was related with the observed light increase of ROS along the life of the worms, the effect of EC in longevity was assessed in presence of a potent antioxidant, N-acetylcysteine (NAC) 5 mM, which has been suggested as a suppressant of the increased ROS generation in *C. elegans* [41]. In order to allow appropriate comparisons, all conditions were assayed at the same concentration of DMSO (0.1%). The results showed that the increment in the maximum lifespan in EC-treated worms was not abolished in the presence of NAC (S1 Fig and S1 Table). In fact, worms grown in the presence of both NAC and EC prolonged significantly their mean and maximum lifespan compared with those treated only with NAC (S1 Fig and S1 Table). These results seem to suggest that EC acts in longevity independently of the moderate elevation in ROS levels, and that NAC and EC influence lifespan through of different mechanisms.

### **Influence of EC on stress resistance in *C. elegans* mutants and in the expression of *daf-16*, *hsf-1* and *skn-1* genes**

The idea that flavonoids do not act in the organism only as conventional antioxidants but also as modulators multiple cellular pathways is currently gaining strength [42]. The IIS pathway contributes to longevity and oxidative or heat shock stress response and it encompasses highly conserved components from nematodes to mammals, including humans [19]. Some authors have reported that several classes of flavonoids seem to influence this pathway [43–45]. However, although there are many works about the beneficial effects of different flavan-3-ols and flavan-3-ol-rich extracts in different organisms including humans, the molecular mechanisms involved in such effects have not been sufficiently studied.

In the present work, those molecular mechanisms have been explored by checking the ability of EC to modulate the stress resistance in mutant worms for different genes of the IIS pathway and genes that are relevant to stress resistance. The premise of these assays was that EC

treatment would not increase the survival of nematodes lacking specific genes that are required for the protection against oxidative damage induced by submitting worms to thermal stress. The stress resistance has been studied in mutant worms at 2<sup>nd</sup> and 9<sup>th</sup> day of adulthood, in order to check whether the results could be different according to their age. Thus, young adults in reproductive age and older adults in post-reproductive age were chosen. Furthermore, the effect of EC on the expression of some of these genes by RT-qPCR in EC-treated worms grown under non-stress conditions and after thermal stress was also investigated.

DAF-2 is the *C. elegans* homologue for the insulin/IGF-1 receptor. Activation of DAF-2 leads to phosphorylation and cytoplasmic sequestration of the DAF-16 transcription factor via AGE-1, PDK-1, AKT-1, AKT-2, and SGK-1 kinases [2]. Herein, the influence of EC on the resistance to thermally-induced stress was checked in *age-1*, *akt-1*, *akt-2*; *sgk-1* and *daf-2* loss of function mutant strains and we found that the treatment with the flavonoid did not lead to significant enhancement in the stress resistance in any of these mutant strains (Fig 5). This result suggests that those genes could be required to explain the mechanisms involved in the effects of the studied flavonoid on improving the resistance against thermal stress in *C. elegans* and also that the resistance to stress mediated by EC involves the IIS pathway. Nevertheless, it is also necessary to take into account that these mutants are long-lived and already more resistant to stress than wild type worms, which might mask a possible increase in the survival of the stressed animals produced by EC.

Proper regulation of IIS is crucial for the protection of *C. elegans* from both external and internal stresses [15]. The key downstream transcription factors of IIS pathway that contribute to longevity and regulate the resistance to a variety of stress include DAF-16/FOXO, HSF-1 and SKN-1 [15]. Thus, we examined the oxidative stress resistance of loss-of-function *daf-16*, *hsf-1* and *skn-1* mutant worms treated with EC. The results showed that treatment with EC did not increase the survival of these mutants (Fig 6), suggesting that these genes are required for EC-mediated enhanced thermal stress resistance in *C. elegans*. Similar results were obtained for both young adults (day 2) and older worms (day 9).

Contrary to our observations, Saul et al. [46] found that 200  $\mu$ M of catechin significantly prolonged the lifespan in *age-1* and *daf-16* mutants, indicating that AGE-1 and DAF-16 would not be required for the life-extending effect of this flavan-3-ol. However, no significant lifespan extension was observed in *akt-2* mutants, suggesting that AKT-2 was at least partly involved in the catechin mediated longevity. Those authors concluded that the IIS-pathway was not required for the life extending effect of catechin and that the results obtained for AKT-2 could be explained because of a possible AKT-2 function independent of IIS pathway. On the contrary, Cai et al. [47] reported that the lifespan extension effect of the flavonol icaraside II was dependent on the IIS pathway, since *daf-16* and *daf-2* loss-of-function mutants failed to show any lifespan extension upon treatment with this compound.

DAF-16, a FOXO-family transcription factor, influences the rate of aging in response to insulin/insulin-like growth factor (IGF-1) signalling by upregulating a wide variety of genes including cellular stress-response, lifespan, antimicrobial and metabolic genes [19]. As above discussed, the treatment with EC did not enhance resistance to thermal stress of *daf-16(mu86)* mutant worms, either at days 2 or 9 of adulthood (Fig 6A and 6B), pointing to DAF-16 being involved in EC activity. In order to obtain further support to this assumption, the effect of EC on *daf-16* expression in wild-type *C. elegans* under normal growth conditions and after thermal stress exposure was examined by RT-qPCR. It was found that *daf-16* mRNA levels were enhanced in worms grown in the presence of 200  $\mu$ M of epicatechin, both subjected and not to thermal stress, although this increase was only significant in worms grown under non-stressed conditions (Fig 7A and 7B). These results support the idea of DAF-16 playing a key role in the effects produced by EC in worms.

HSF-1 is a transcription factor that regulates heat shock response and also has an influence in aging [18]. As for *daf-16*, the expression of *hsf-1* was quantified in wild type worms under normal growth conditions and after thermal stress. The results showed an increase in the

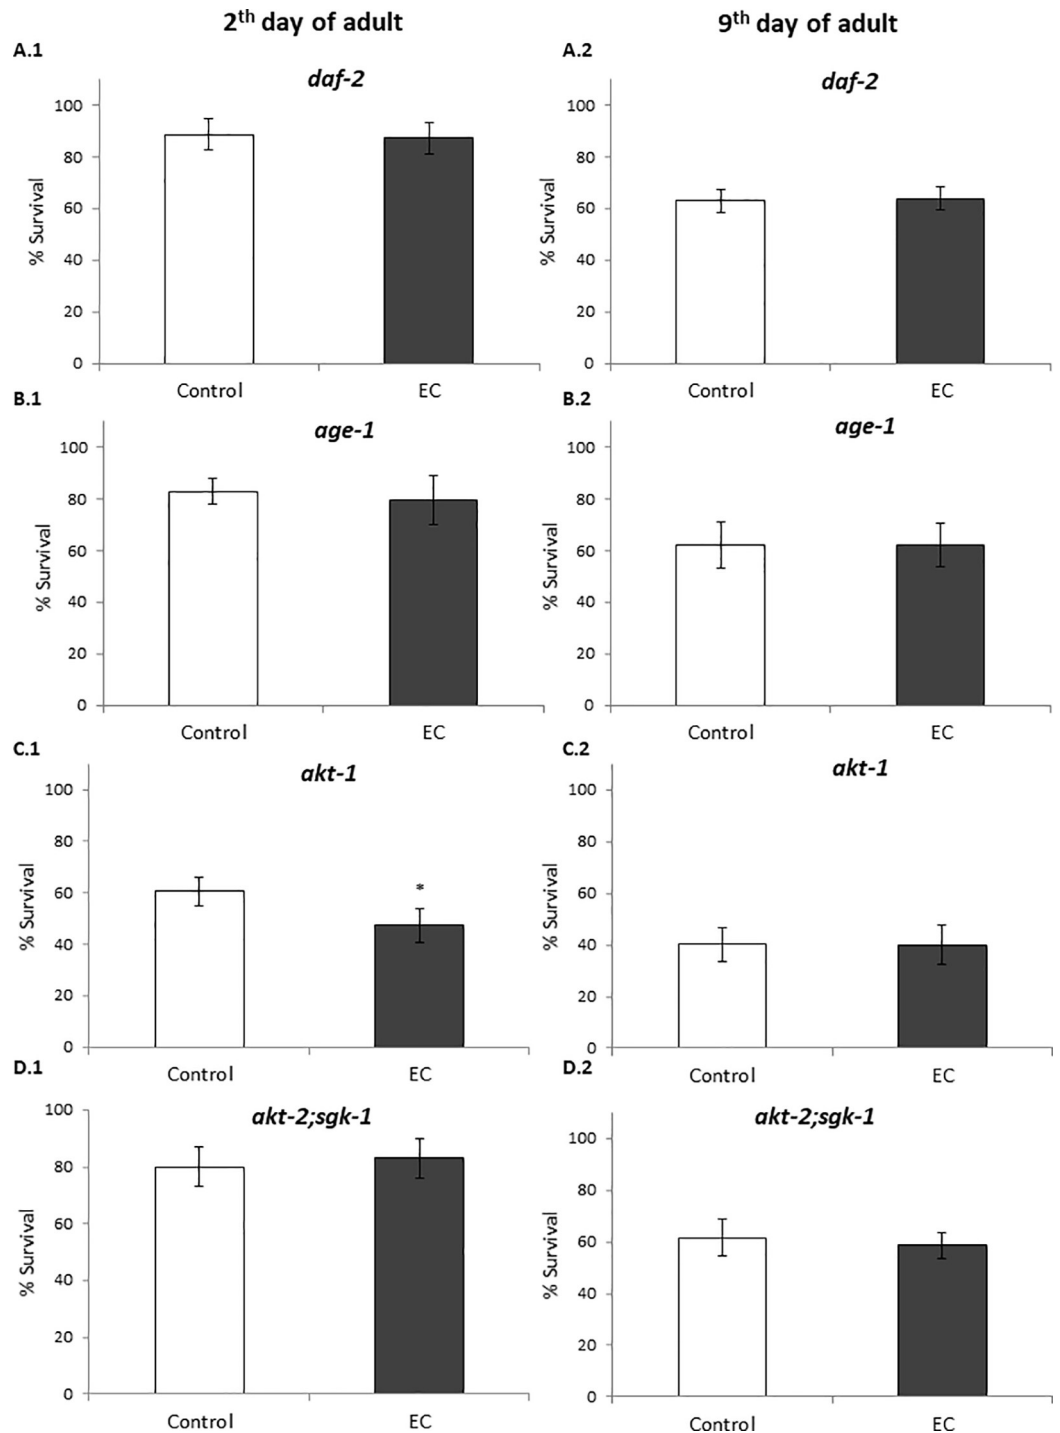

**Fig 5. Percentages of survival following thermal stress applied at days 2<sup>nd</sup> and 9<sup>th</sup> of adulthood in different long-lived *C. elegans* mutants from the IIS pathway cultivated in the absence (controls) and presence of EC (200 μM) in the culture media.** Three independent experiments were performed. The results are presented as the mean values±SD. Statistical significance was calculated using the Chi Square Test. The differences were considered significant at \* ( $p < 0.05$ ).

<https://doi.org/10.1371/journal.pone.0199483.g005>

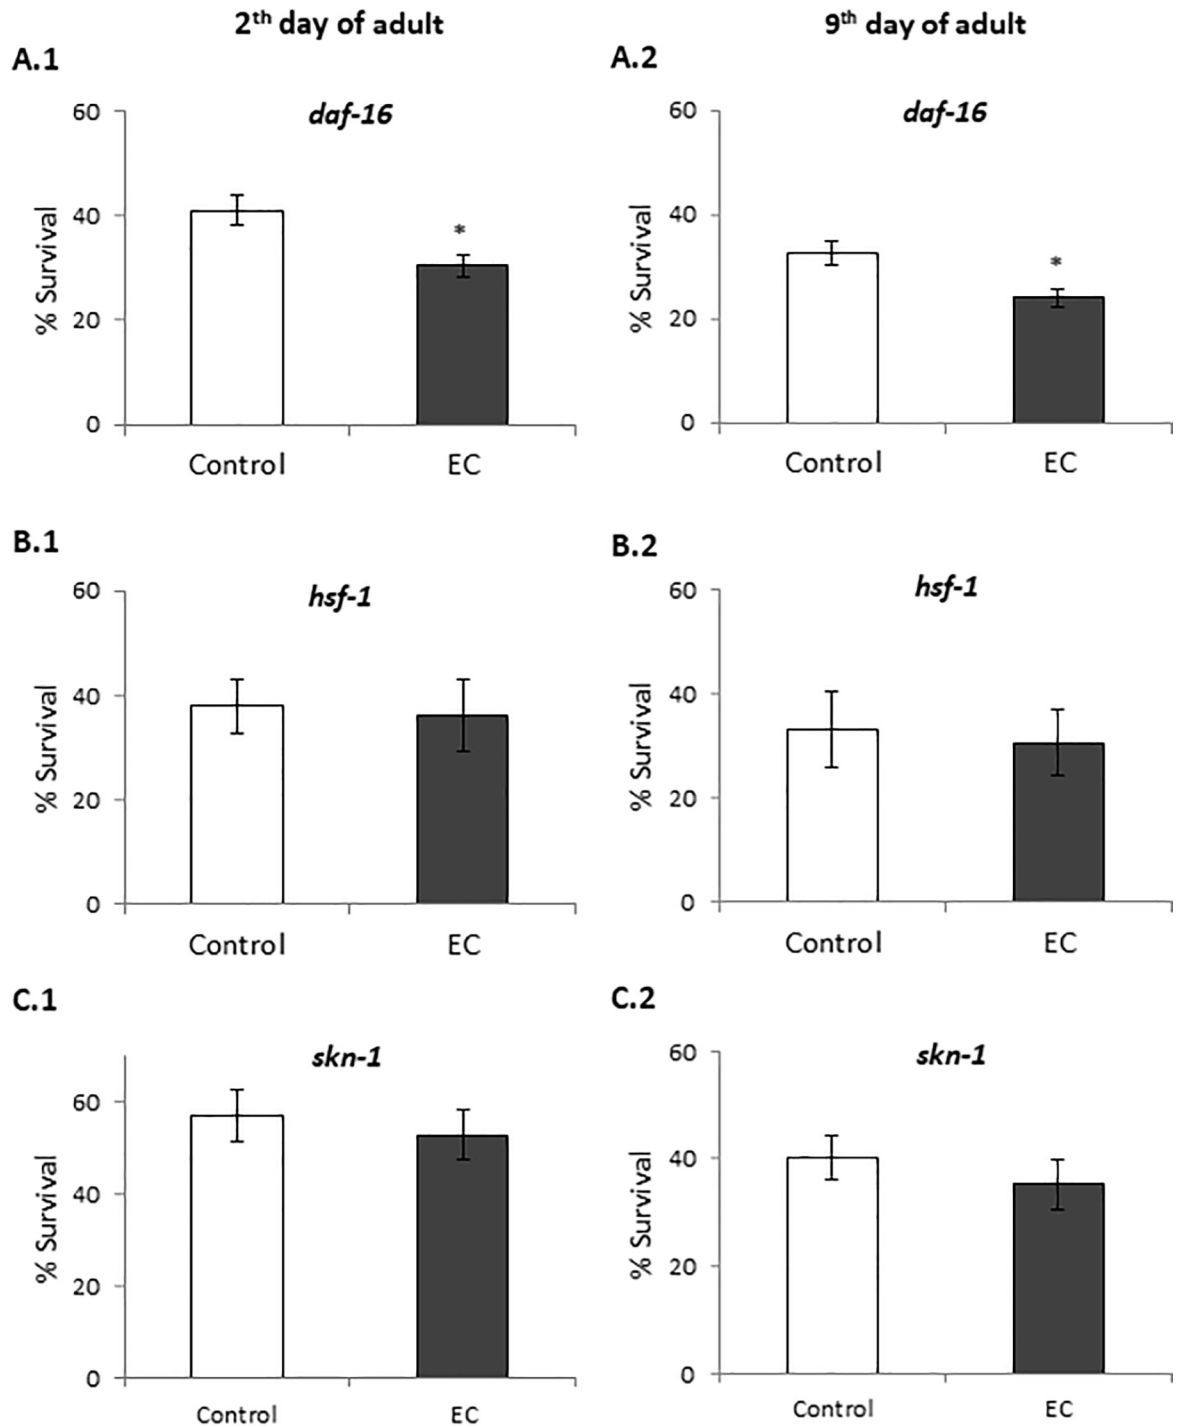

**Fig 6.** Percentage of survival following thermal stress applied at days 2nd (A, C and D) and 9th (B, D and F) of adulthood in *daf-16* (*mu86*), *hsf-1* (*sy441*) and *skn-1* (*zu67*) mutants cultivated in the absence (controls) and presence of EC (200  $\mu$ M) in the culture media. Three independent experiments were performed. The results are presented as the mean values  $\pm$ SD. Statistical significance was calculated using the Chi Square Test. D The differences were considered significant at \* ( $p < 0.05$ ).

<https://doi.org/10.1371/journal.pone.0199483.g006>

expression of this transcription factor in both conditions although the increase was only significant only in thermal stress conditions (Fig 7A and 7B). These results, together with the fact that EC did not increase the resistance to thermal stress of *hsf-1* mutants (Fig 6C and 6D),

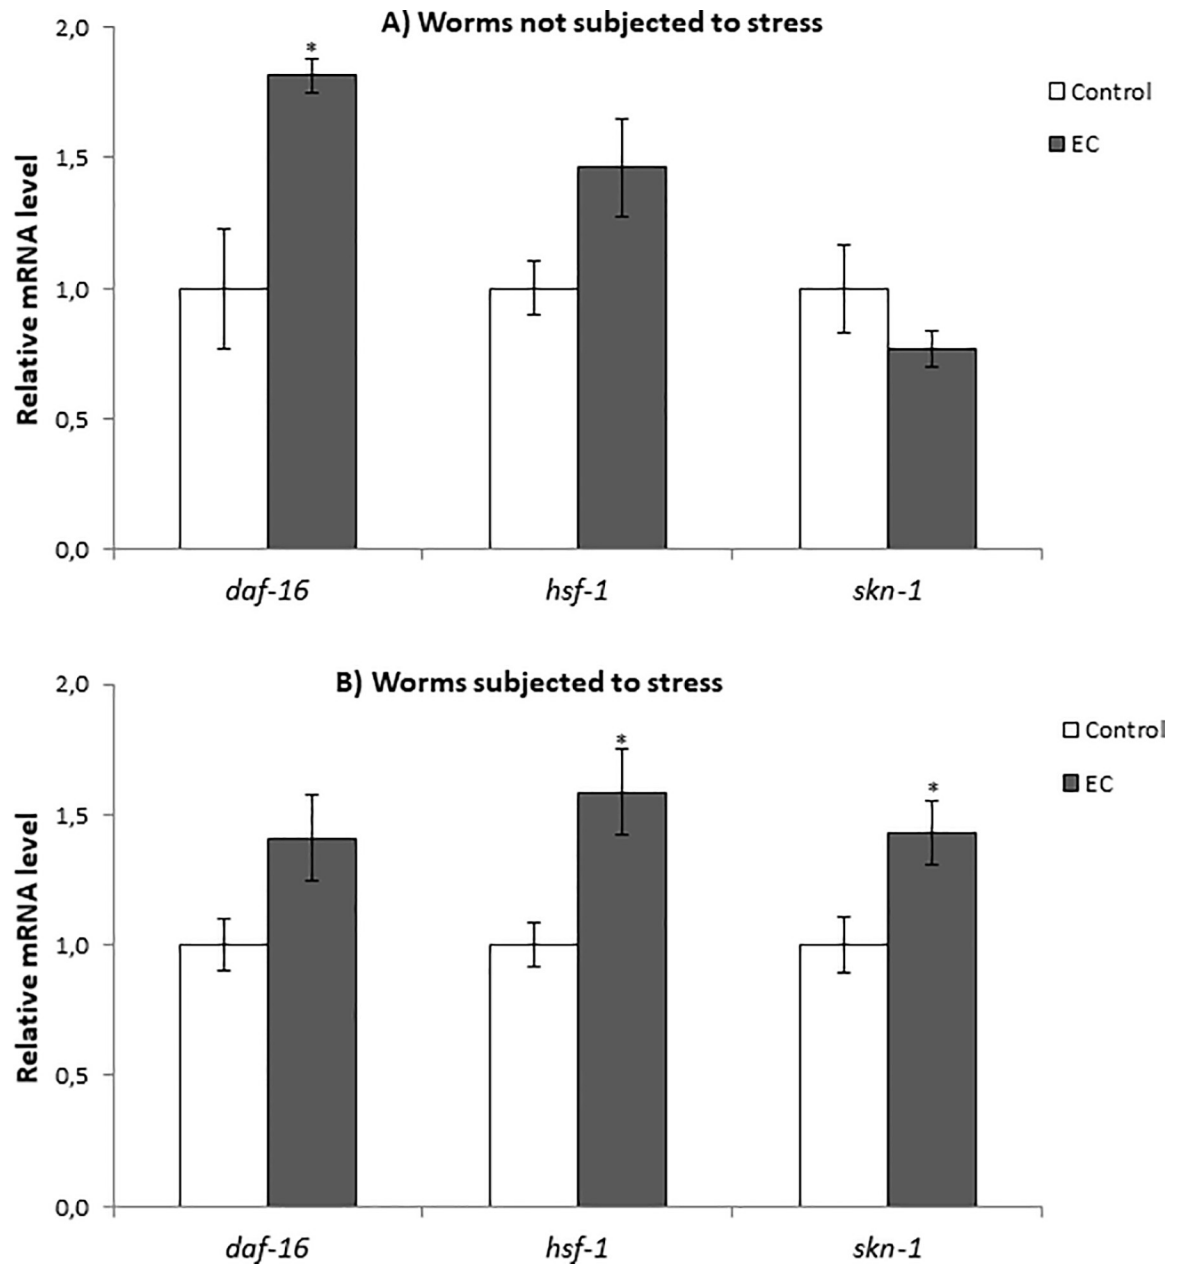

**Fig 7.** Effect of EC on the expression of *daf-16*, *hsf-1* and *skn-1* genes in wild-type *C. elegans* cultivated in the absence (controls) and presence of EC (200  $\mu$ M) in the culture media grown under non-stressed conditions (A) or after subjecting them to thermal stress (B). The expression level was determined by RT-qPCR; *act-1* was used as an internal control. Nine independent experiments were performed. The results are presented as the mean values  $\pm$  SEM. Statistical significance was calculated using by one-way analysis of variance ANOVA. The differences were considered significant at (\* $p < 0.05$ ).

<https://doi.org/10.1371/journal.pone.0199483.g007>

could indicate that *hsf-1* is also involved in the effects produced by EC in the worms. Similar observations were made regarding SKN-1 homologue of Nrf-2 transcription factor, which regulates lifespan and oxidative stress response by mobilizing the conserved phase 2 detoxification response [17]. In this case, RT-qPCR experiments showed that EC significantly increased the expression of *skn-1* under stress but not in normal growth conditions (Fig 7A and 7B). These results, together with the survival assays in which no significant increase was observed in the



survival of EC-treated *skn-1(zu67)* mutants compared to control worms (Fig 6E and 6F), also suggested the involvement of SKN-1 in the effects of EC. Altogether, these results indicated that the improvement in stress resistance produced by EC involves the IIS pathway by regulating the expression of *daf-16*, *hsf-1* and *skn-1* genes independently of the worm age.

In line with the results obtained herein, higher resistance to oxidative stress and increased lifespan was found in *C. elegans* treated with a flavonoid-enriched cocoa powder that contained catechin, epicatechin and procyanidins, which was explained to be mediated by the IIS pathway and sirtuin proteins [42]. Similar studies with chlorogenic acid also concluded that this polyphenol activates the transcription factors DAF-16, HSF-1, SKN-1 and HIF-1, although not SIR-2.1 [48]. By contrast, Saul et al [49] found that the forkhead transcription factor DAF-16 was not essential for quercetin effects on longevity and stress resistance. The same group showed that quercetin-mediated lifespan extension was neither a caloric restriction mimetic effect nor a sirtuin (*sir-2.1*) dependent process, but it was modulated by four genes: *age-1*, *daf-2*, *unc-43* and *sek-1*, identified as a likely mode of action [21]. These observations might indicate that different mechanisms of action could be involved in the effects on longevity and stress resistance induced by different polyphenols.

### Effect of epicatechin on DAF-16 subcellular localization and expression of *gst-4*, *hsp-16.2*, *hsp-70* and *sod-3*

In order to delve into the molecular mechanisms involved in the stress and lifespan modulation, the effect of EC on the expression of the specific cellular stress response genes *sod-3* (superoxide dismutase), *gst-4* (glutathione-S-transferase), *hsp-16.2* and *hsp-70* (heat-shock proteins) was explored. SOD-3 is an antioxidant enzyme that protects against oxidative stress by catalysing the removal of superoxide. The gene *sod-3* is thought to be a direct target of DAF-16 as the *sod-3* promoter contains consensus DAF-16/FOXO-binding elements (DBEs) [50]. GST-4 enzyme is involved in the Phase II detoxification pathway, playing an important role in resistance to oxidative stress; its expression is mediated by SKN-1 [51]. Heat shock proteins (HSP) are induced in response to thermal and other environmental stresses. The expression of *hsp* genes is mainly regulated by heat shock transcription factor (HSF-1), which is also influenced by the IIS pathway in *C. elegans* [2]. For this study, transgenic strains expressing GFP under the control of *gst-4*, *sod-3*, *hsp-16.2* and *hsp-70* promoters were used. Also, a transgenic strain expressing a fusion protein DAF-16::GFP was used to examine whether EC treatment activated DAF-16 nuclear translocation under normal and stress conditions.

EC (200  $\mu$ M) was found to significantly enhance the expression levels of GST-4, HSP-16.2 and HSP-70, whereas no differences existed in the expression of SOD-3 (Fig 8). GFP expression levels were determined under non-stressed conditions for *gst-4* and *sod-3*, reporters while for *hsp-16.2* and *hsp-70* reporters, worms had to be previously subjected to a heat shock (35°C, 1h) and further let to recover at 20°C for 2h (*hsp-16.2*) or 3h (*hsp-70*). For *hsp-16.2* and *hsp-70* reporter strains fluorescence was hardly detected before heat stress and no differences between the control and EC-treated worms were observed (S2 Fig). Regarding DAF-16, EC treatment failed to induce DAF-16::GFP nuclear translocation respect to the control under both in unstressed or under stress conditions (Fig 9). As a short thermal stress (35°C, 1h) of the DAF-16::GFP reporter strain is enough to provoke DAF-16 nuclear translocation, it is difficult to observe slight changes induced by the treatment with EC.

As previously discussed, EC treatment did not increase oxidative stress resistance in *daf-16* (*mu86*) mutant nematodes and produced an increase in *daf-16* mRNA expression in wild type worms, suggesting that EC protected against thermal stress in a DAF-16-dependent manner. However, EC treatment did not increase SOD-3::GFP expression, which is coherent with the

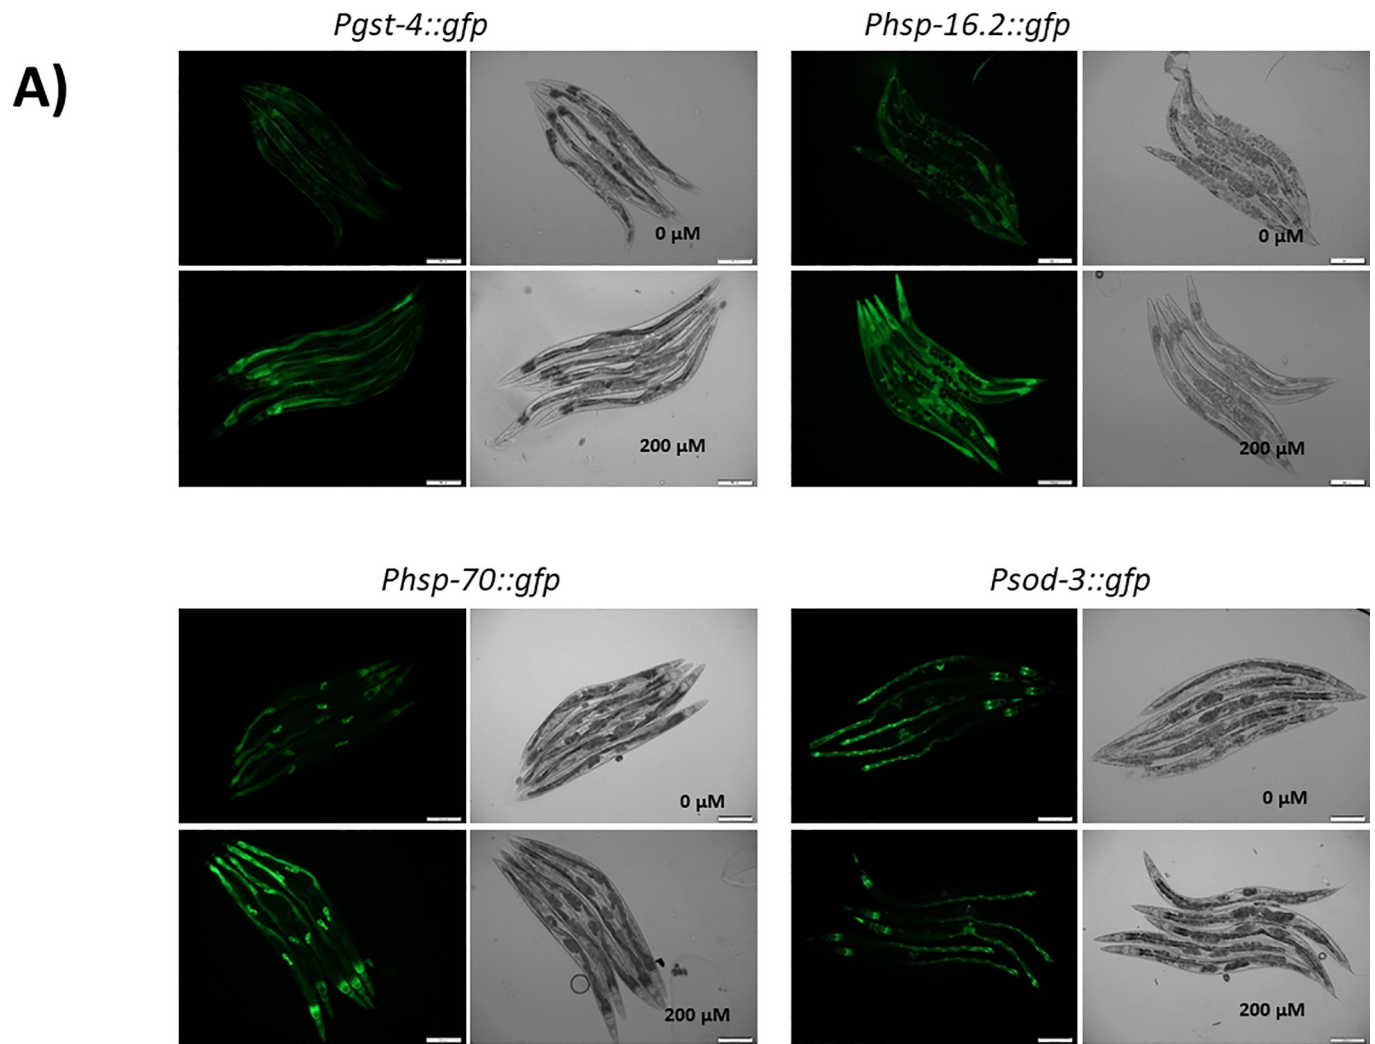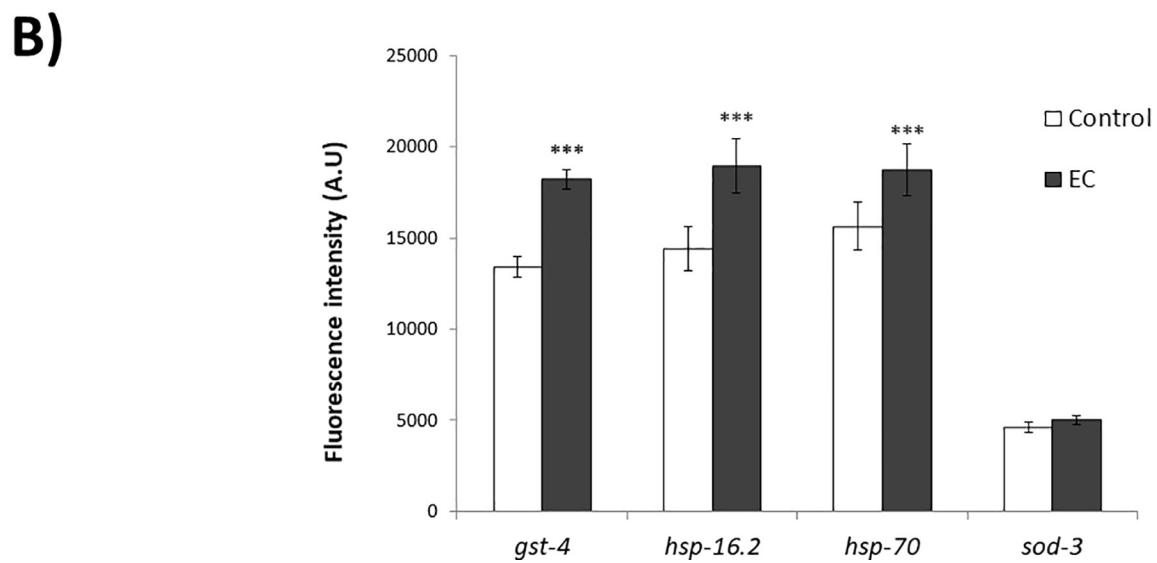

**Fig 8. Effect of EC on the expression of *gst-4*, *sod-3*, *hsp-16.2* and *hsp-70* in *C.elegans*.** Age-synchronized L1 transgenic worms of *Pgst-4::gfp*, *Psod-3::gfp*, *Phsp-16.2::gfp* and *Phsp-70::gfp* reporter strains were cultivated in the absence (controls) and presence of EC (200  $\mu$ M) in the culture media. **A)** Representative fluorescence images of control and EC-treated worm strains stress response. **B)** Relative fluorescence intensities of transgenic worms. Total GFP fluorescence of each whole worm was quantified using Image J software. Three independent experiments were performed. The results are presented as the mean values  $\pm$  SEM. Approximately 35 randomly selected worms from each set of experiments were examined. Differences compared with the control (0  $\mu$ M, 0.1% DMSO) were considered statistically significant at  $p < 0.05$  (\*) and  $p < 0.01$  (\*\*) and  $p < 0.001$  (\*\*\*) by one-way ANOVA.

<https://doi.org/10.1371/journal.pone.0199483.g008>

results obtained in a previous study of our group [23], where no increase in the activity of SOD was found after treatment of the worms with EC. Bonomo et al. [45] obtained similar results in worms treated with a polyphenols-rich extract of Açai, with no observation of an increase in oxidative resistance in *daf-16(mu86)* mutant worms, as well as no increase in DAF-16 nuclear localization and *sod-3* expression under normal conditions. According to those authors [45], this might be explained as the polyphenols extract would lead DAF-16 protein to increase its transcriptional activity but not its concentration, thus DAF-16 activation in the nucleus leading to the upregulation of specific genes other than *sod-3*. In fact, they also observed that the extract increased the expression of genes *ctl-1* and *gst-7* in a DAF-16 dependent manner. In order to check whether the explanation proposed by Bonomo et al. [45] applied to our observations, the expression of those two DAF-16 target genes (*ctl-1* and *gst-7*) was now measured in N2 worms grown in the presence of EC. The obtained results (Fig 10) showed a significant upregulation of the transcripts levels of *gst-7*, whereas not significant increase was observed in the mRNA levels of *ctl-1*. These findings were in agreement with the observations made by our group in a previous study [23], where no significant changes were found in the enzymatic activity of catalase after treatment with EC, while an enhancement was produced in reduced glutathione (GSH) levels. All in all, the current results suggested that the treatment with EC produced a more important effects in DAF-16 target genes other than *sod-3* or *ctl-1* (encoding antioxidant enzymes), such as *gst-7* (a glutathione S-transferase) and *hsp-16.2* and *hsp-70* that encode heat shock proteins.

The GFP expression in some reporter strains studied (*Phsp-16.2::gfp*, *Psod-3::gfp* and *Pdaf-16::daf-16::gfp*) was also investigated in older worms (9<sup>th</sup> day of adulthood) in order to know if the mode of action of EC changed depending on the age of the worm. Similar results were obtained as in younger worms, with no differences in DAF-16 nuclear translocation (S3 Fig) and in the expression of *sod-3* between control and EC-treated worms being observed (S4 Fig). However, the increase expression of *hsp-16.2* after thermal stress compared to controls was more accentuated in older worms (S4 Fig). This observation is relevant, because heat shock proteins levels decrease in aged worms leading to an increase of unfolded proteins, so that worms become more sensitive to stress, finally increasing mortality [44].

Our results identify a significant increase of *gst-4* expression, the loss of resistance to thermal stress in *skn-1(zu67)* mutants and increased *skn-1* expression in worms treated with EC, suggesting that EC could be modulating the Nrf2/SKN-1 pathway. The transcription factor SKN-1 is the ortholog of the mammalian Nrf protein, which induces the expression of phase-II detoxifying enzymes and antioxidant proteins, such as SOD, GST, glutathione peroxidase (GPO) or NAD(P)H:quinone oxidoreductase (NQO-1) [2, 17]. This control is mediated through an antioxidant response elements (ARE) in the promoter region of genes encoding phase II enzymes and antioxidant components. Several additional ARE-containing genes were predicted to be direct SKN-1 targets, such as GST-4 (glutathione transferase-4), which acts conjugating the reduced form of glutathione (GSH) to a variety of toxic substrates including damaged lipids and proteins, thereby decreasing their activity and making them more water soluble favouring their removal [51, 52]. The increased SKN-1 activity could explain the decrease of peroxidated lipids and carbonylated proteins in worms treated with EC with

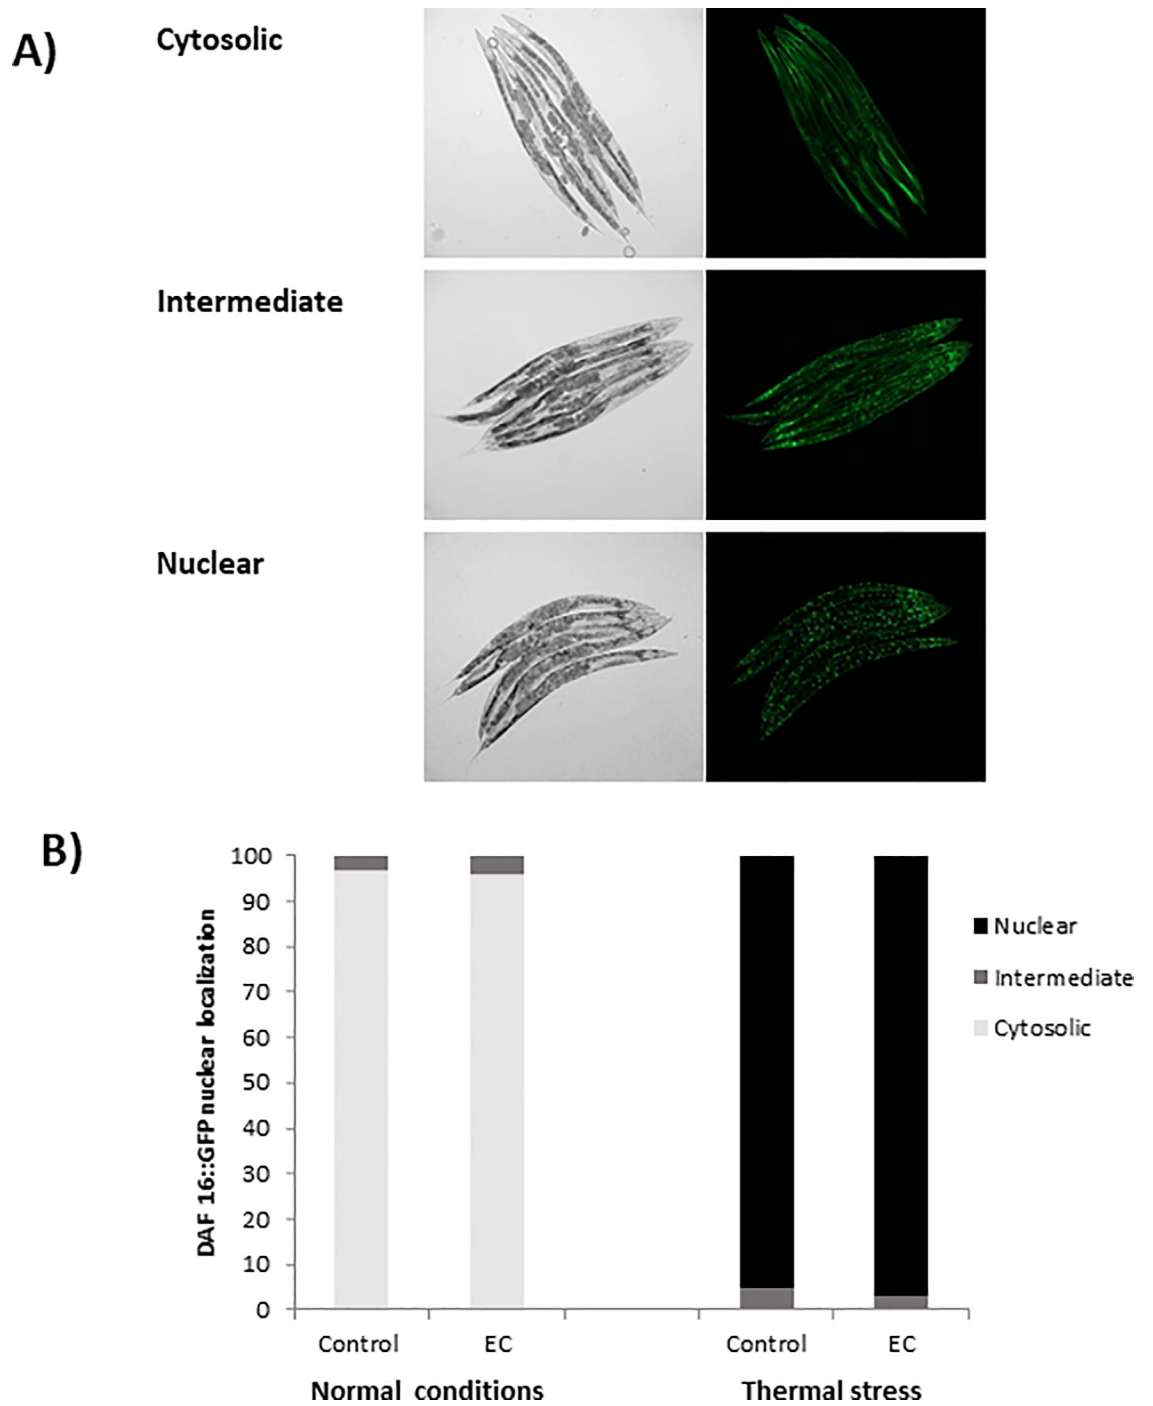

**Fig 9. Effect of EC on DAF-16::GFP nuclear localization.** Transgenic worms expressing the fusion protein DAF-16::GFP were cultivated in the absence (controls) and presence of EC (200  $\mu$ M) and evaluated at 2<sup>nd</sup> day of adulthood. DAF-16::GFP subcellular distribution was classified as cytosolic, intermediate and nuclear.

<https://doi.org/10.1371/journal.pone.0199483.g009>

respect to untreated animals. In a previous study, our group also showed that the treatment with EC produced a significant increase in the levels of GSH in *C. elegans* with respect to non treated worms [23]. Similar observations were made in assays carried out on astrocytes [53] and HepG2 cells [54], where the treatment with EC activated Nrf2 and increased GSH levels.

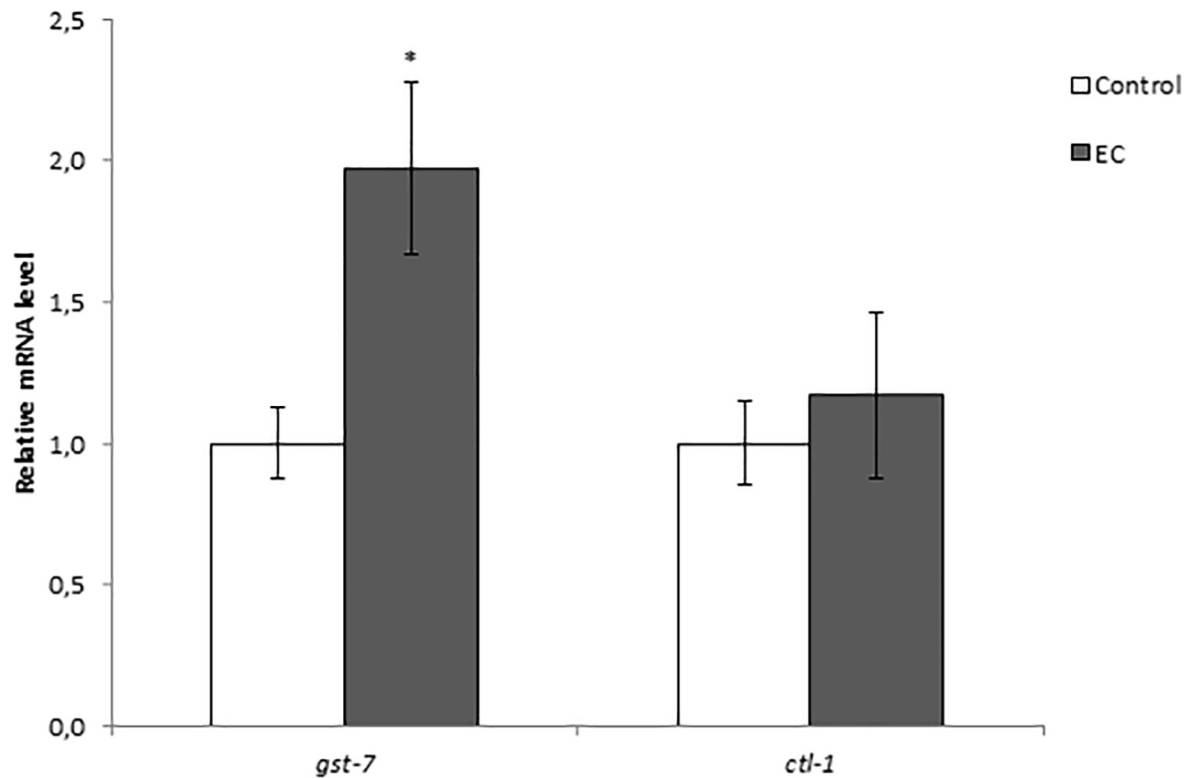

**Fig 10. Effect of EC on the expression of *gst-7* and *ctl-1* genes in wild-type *C. elegans* cultivated in the absence (controls) and presence of EC (200 μM).** The expression level was determined by RT-qPCR; *act-1* was used as an internal control. Nine independent experiments were performed. The results are presented as the mean values ± SEM. Statistical significance was calculated using by one-way analysis of variance ANOVA. The differences were considered significant at (\* $p < 0.05$ ).

<https://doi.org/10.1371/journal.pone.0199483.g010>

Furthermore, it is also known that the Nrf-2-ARE pathway is activated by reactive oxygen species [55]. Thus, the moderate increase in ROS levels observed in worms treated with EC (Fig 3) could lead to the activation of this pathway, ultimately inducing endogenous antioxidant protection and conferring a great protection against oxidative damage.

Tullet et al. [17, 56] proposed that the effects of SKN-1 on resistance to oxidative stress and longevity can be dissociated with SKN-1 being required for resistance to oxidative stress but not for the increased lifespan resulting from overexpression of DAF-16. On the other hand, DAF-16 overexpression rescues the short lifespan of *skn-1* mutants but not their hypersensitivity to oxidative stress. This dual function could explain the effects of EC in *C. elegans* observed herein, where EC-treated worms showed improved resistance to thermal stress but not increased mean lifespan.

High levels of HSP promote longevity and are also a predictor of the ability to withstand thermal stress [24, 57]. Hsu et al. suggested that HSF-1 and DAF-16 together activate the expression of specific genes, including genes encoding HSP, which in turn promote longevity [18]. HSP act as molecular chaperones and proteases by preventing the accumulation of aggregated proteins in response to heat and other forms of stress. This activity may prevent oxidized or otherwise damaged proteins from aggregating before they can be refolded or degraded [18]. The results obtained in the present study showed that EC upregulated HSP-16.2 and HSP-70 in *C. elegans*, which might explain why EC significantly increased the survival of *C. elegans* under heat stress and maximum lifespan. Other authors have also related the improvement in lifespan and increase of thermal stress resistance in *C. elegans* induced by different

polyphenols with the capacity to upregulate *hsp* and other genes associated to stress resistance [20, 24, 58].

## Conclusions

The treatment of *C. elegans* with epicatechin leads to an increase in the survival of the nematode when subjected to thermal stress, as well as to a decrease in the levels of lipid peroxidation and carbonylated proteins. These results suggest a protection of EC against oxidative damage, still observable in older worms. The levels of reactive oxygen species show different behaviour depending on the age of the nematode. Although the influence of ROS levels on the survival of *C. elegans* is still under discussion, the results obtained in this study suggest that the moderate elevation in ROS levels produced by EC treatment does not seem to be correlated with detrimental effects. On the other hand, the life extending effect of EC is still observed in the presence of a potent antioxidant like NAC.

The protective effects of EC against stress could be mediated through regulation of the insulin/IGF-1 signalling pathway, since stress resistance assays revealed that the heat-resistant phenotype was absent in *daf-2*, *age-1*, *akt-1*, *akt-2*, *sgk-1*, *daf-16*, *skn-1* and *hsf-1* mutants. Besides, EC upregulates the expression of enzymes of phase II (*gst-4* and *gst-7*) and heat shock proteins (*hsp-16.2* and *hsp-70*), which would improve the capacity of detoxification and elimination of damaged proteins in the worm. Overall, the observations of this study indicated that the effects of EC are achieved by the regulation of the expression of different genes independently of the worm age, although in the case of *hsp-16.2* expression, the increase is more pronounced in later aging stages of *C. elegans*, when under physiological conditions are diminished due to aging.

## Supporting information

**S1 Table. Influence of 200  $\mu$ M epicatechin, 5mM N-acetylcysteine (NAC) and both NAC and EC on lifespan of *C. elegans* under normal growth conditions, at 20°C.**

(TIF)

**S1 Fig. Survival curves of *C. elegans* grown in culture media containing 200  $\mu$ M epicatechin, 5mM N-acetylcysteine (NAC) or both NAC and EC.**

(TIF)

**S2 Fig. Effect of EC on the expression of *hsp-16.2* and *hsp-70* in *C. elegans*.** Age-synchronized L1 transgenic worms expressing *Phsp-16.2::gfp* and *Phsp-70::gfp* transgenes were cultivated in the absence (controls) and presence of EC (200  $\mu$ M) in the culture media. Relative GFP fluorescence intensities in transgenic **A) *Phsp-16.2::gfp*** and **B) *Phsp-70::gfp*** worms were quantified under normal growth conditions and after subjecting worms to thermal stress to 35°C for 1h. Total GFP fluorescence of each whole worm was quantified using Image J software. Three independent experiments were performed. The results are presented as the mean values  $\pm$  SEM. Approximately 35 randomly selected worms from each set of experiments were examined. Differences compared with the control (0  $\mu$ M, 0.1% DMSO) were considered statistically significant at  $p < 0.05$  (\*) and  $p < 0.01$  (\*\*) and  $p < 0.001$  (\*\*\*) by one-way ANOVA.

(TIF)

**S3 Fig. Effect of EC on DAF-16::GFP nuclear localization.** Transgenic worms expressing the DAF-16::GFP fusion protein were cultivated in the absence (controls) and presence of EC (200  $\mu$ M) and evaluated at 9<sup>th</sup> day of adulthood. DAF-16::GFP subcellular localization was classified as cytosolic, intermediate and nuclear.

(TIF)

**S4 Fig. Effect of EC on the expression of *sod-3* and *hsp-16.2* in old worms (day 9<sup>th</sup> of adult).** Age-synchronized L1 transgenic worms of *Psod-3:gfp* and *Phsp-16.2:gfp* were cultivated in the absence (controls) and presence of EC (200  $\mu$ M) in the culture media. Total GFP fluorescence of each whole worm was quantified using Image J software. Three independent experiments were performed. The results are presented as the mean values  $\pm$  SEM. Approximately 35 randomly selected worms from each set of experiments were examined. Differences compared with the control (0  $\mu$ M, 0.1% DMSO) were considered statistically significant at  $p < 0.05$  (\*) and  $p < 0.01$  (\*\*) and  $p < 0.001$  (\*\*\*) by one-way ANOVA. (TIF)

## Acknowledgments

This work was funded by MINECO (Spanish National Project AGL2015-64522-C2) (BFU2015-64408-P) and FEDER-Interreg España-Portugal Programme (Project ref. 0377\_IBERPHENOL\_6\_E). B.A-D is recipient of PhD fellowships from the Junta de Castilla y Leon (Orden EDU/310/2015). The authors are thankful to Marta Rodríguez-Romero and José Antonio Mora-Lorca for providing the necessary help with the assays of RT-qPCR and fluorescence microscopy, respectively.

## Author Contributions

**Conceptualization:** Celestino Santos-Buelga, Ana M. González-Paramás.

**Formal analysis:** Begoña Ayuda-Durán, Susana González-Manzano, Montserrat Dueñas.

**Funding acquisition:** Antonio Miranda-Vizuete, Celestino Santos-Buelga, Ana M. González-Paramás.

**Methodology:** Begoña Ayuda-Durán, Susana González-Manzano, Antonio Miranda-Vizuete.

**Project administration:** Celestino Santos-Buelga, Ana M. González-Paramás.

**Resources:** Antonio Miranda-Vizuete, Celestino Santos-Buelga, Ana M. González-Paramás.

**Supervision:** Antonio Miranda-Vizuete, Celestino Santos-Buelga, Ana M. González-Paramás.

**Writing – original draft:** Begoña Ayuda-Durán, Celestino Santos-Buelga.

**Writing – review & editing:** Begoña Ayuda-Durán, Susana González-Manzano, Antonio Miranda-Vizuete, Celestino Santos-Buelga, Ana M. González-Paramás.

## References

1. Santos-Buelga C, Scalbert A. Proanthocyanidins and tannin-like compounds—nature, occurrence, dietary intake and effects on nutrition and health. *J. Sci. Food Agric.* 2000; 80: 1094–1117.
2. Koch K, Havermann S, Büchter C, Wätjen W. *Caenorhabditis elegans* as Model System in Pharmacology and Toxicology: Effects of Flavonoids on Redox-Sensitive Signalling Pathways and Ageing. *Sci. World J.* 2014; 2014: 920398.
3. Kenyon C. The Plasticity of Aging: Insights from Long-Lived Mutants. *Cell.* 2005; 120: 449–460. <https://doi.org/10.1016/j.cell.2005.02.002> PMID: 15734678
4. Kenyon CJ. The genetics of ageing. *Nature.* 2010; 464: 504–12. <https://doi.org/10.1038/nature08980> PMID: 20336132
5. Lapointe J, Hekimi S. When a theory of aging badly. *Cell. Mol. Life Sci.* 2010; 67: 1–8. <https://doi.org/10.1007/s00018-009-0138-8> PMID: 19730800
6. Ames BN, Shigenaga MK, Hagen TM. Oxidants, antioxidants, and the degenerative diseases of aging. *Proc Natl Acad Sci.* 1993; 90: 7915–7922. PMID: 8367443

7. Sohal RS, Orr WC. The redox stress hypothesis of aging. *Free Radic Biol Med*. 2012; 52: 539–555. <https://doi.org/10.1016/j.freeradbiomed.2011.10.445> PMID: 22080087
8. Ristow M, Schmeisser K. Mitohormesis: Promoting Health and Lifespan by Increased Levels of Reactive Oxygen Species (ROS). Dose-Response. 2014; 12: 288–341. <https://doi.org/10.2203/dose-response.13-035.Ristow> PMID: 24910588
9. Guarente L, Kenyon C. Genetic pathways that regulate ageing in model organisms. *Nature*. 2000; 408: 255–262. <https://doi.org/10.1038/35041700> PMID: 11089983
10. Tissenbaum HA. Using *C. elegans* for aging research. *Invertebr Reprod Dev*. 2015; 59(sup1): 59–63. <https://doi.org/10.1080/07924259.2014.940470> PMID: 26136622
11. Silverman GA, Luke CJ, Bhatia SR, Long OS, Vetica AC, Perlmutter DH, et al. Modeling molecular and cellular aspects of human disease using the nematode *Caenorhabditis elegans*. *Pediatr Res*. 2009; 65: 10–8. <https://doi.org/10.1203/PDR.0b013e31819009b0> PMID: 18852689
12. Schuster E, McElwee JJ, Tullet JM, Doonan R, Matthijssens F, Reece-Hoyes JS, et al. DamID in *C. elegans* reveals longevity-associated targets of DAF-16/FoxO. *Mol Syst Biol*. 2010; 10: 6–399.
13. Lin K, Dorman JB, Rodan A, Kenyon C. daf-16: An HNF-3/forkhead family member that can function to double the life-span of *Caenorhabditis elegans*. *Science*. 1997; 278: 1319–1322. PMID: 9360933
14. Ogg S, Paradis S, Gottlieb S, Patterson GI, Lee L, Tissenbaum HA, et al. The Fork head transcription factor DAF-16 transduces insulin-like metabolic and longevity signals in *C. elegans*. *Nature*. 1997; 389: 994–999. <https://doi.org/10.1038/40194> PMID: 9353126
15. Altintas O, Park S, Lee SJV. The role of insulin/IGF-1 signaling in the longevity of model in vertebrates, *C. elegans* and *D. melanogaster*. *BMB Rep*. 2016; 49: 81–92. <https://doi.org/10.5483/BMBRep.2016.49.2.261> PMID: 26698870
16. Antebi A. Genetics of Aging in *Caenorhabditis elegans*. *Plos Genetics*. 2007; 3(9): 1565–1571. <https://doi.org/10.1371/journal.pgen.0030129> PMID: 17907808
17. Tullet JM, Hertweck M, An JH, Baker J, Hwang JY, Liu S, et al. Direct inhibition of the longevity-promoting factor SKN-1 by insulin-like signaling in *C. elegans*. *Cell*. 2008; 132: 1025–38. <https://doi.org/10.1016/j.cell.2008.01.030> PMID: 18358814
18. Hsu A, Coleen T, Kenyon C. Regulation of Aging and Age-Related Disease by DAF-16 and Heat-Shock Factor. *Science*. 2003; 300: 1142–1145. <https://doi.org/10.1126/science.1083701> PMID: 12750521
19. Murphy CT, McCarroll SA, Bargmann C, Fraser A, Kamath RS, Ahringer J, et al. Genes that act downstream of DAF-16 to influence the lifespan of *Caenorhabditis elegans*. *Nature*. 2003; 424: 277–83. <https://doi.org/10.1038/nature01789> PMID: 12845331
20. Asthana J, Mishra BN, Pandey R. Acacetin promotes healthy aging by altering stress response in *Caenorhabditis elegans*. *Free Radic Res*. 2016; 50: 861–74. <https://doi.org/10.1080/10715762.2016.1187268> PMID: 27150237
21. Pietsch K, Saul N, Menzel R, Stürzenbaum SR, Steinberg CE. Quercetin mediated lifespan extension in *Caenorhabditis elegans* is modulated by age-1, daf-2, sek-1 and unc-43. *Biogerontology*. 2009; 10: 565–578. <https://doi.org/10.1007/s10522-008-9199-6> PMID: 19043800
22. Surco-Laos F, Cabello J, Gómez-Orte E, González-Manzano S, González-Paramás AM, Santos-Buelga C. Effects of O-methylated metabolites of quercetin on oxidative stress, thermotolerance, lifespan and bioavailability on *Caenorhabditis elegans*. *Food Funct*. 2011; 2: 445–456. <https://doi.org/10.1039/c1fo10049a> PMID: 21776484
23. González-Manzano S, González-Paramás AM, Delgado L, Patianna S, Surco-Laos F, Dueñas M, et al. Oxidative status of stressed *Caenorhabditis elegans* treated with epicatechin. *J Agric Food Chem*. 2012; 60: 8911–8916. <https://doi.org/10.1021/jf3004256> PMID: 22651237
24. Zhang L, Jie G, Zhang J, Zhao B. Significant longevity-extending effects of EGCG on *Caenorhabditis elegans* under stress. *Free Radic. Biol. Med*. 2009; 46: 414–421. <https://doi.org/10.1016/j.freeradbiomed.2008.10.041> PMID: 19061950
25. Büchter C, Ackermann D, Havermann S, Honnen S, Chovolou Y, Fritz G, et al. Myricetin-mediated lifespan extension in *Caenorhabditis elegans* is modulated by DAF-16. *Int J Mol Sci*. 2013; 14: 11895–914. <https://doi.org/10.3390/ijms140611895> PMID: 23736695
26. Wang H, Joseph JA. Quantifying cellular oxidative stress by dichlorofluorescein assay using microplate reader. *Free Radic. Biol. Med*. 1999; 27: 612–616. PMID: 10490282
27. Bradford MM. A rapid and sensitive for the quantitation of microgram quantities of protein utilizing the principle of protein-dye binding. *Anal. Biochem*. 1976; 72: 248–254. PMID: 942051
28. Andreoli A, Manini P, Corradi M, Mutti A, Niessen WM. Determination of patterns of biologically relevant aldehydes in exhaled breath condensate of healthy subjects by liquid chromatography/atmospheric chemical ionization tandem mass spectrometry. *Rapid Commun. Mass Spectrom*. 2003; 17: 637–645. <https://doi.org/10.1002/rcm.960> PMID: 12661015



29. Chaudhuri AR, De Waal EM, Pierce A, Remmen HV, Ward WF, Richardson A. Detection of protein carbonyls in aging liver tissue: A fluorescence-based proteomic approach. *Mech Ageing Dev.* 2006; 127: 849–861. <https://doi.org/10.1016/j.mad.2006.08.006> PMID: 17002888
30. Livak KJ, Schmittgen TD. Analysis of relative gene expression data using Real-Time Quantitative PCR and the 2- $\Delta\Delta$ CT method. *Methods.* 2001; 25: 402–408. <https://doi.org/10.1006/meth.2001.1262> PMID: 11846609
31. Surco-Laos F, Dueñas M, González-Manzano S, Cabello J, Santos-Buelga C, González-Paramás AM. Influence of catechins and their methylated metabolites on lifespan and resistance to oxidative and thermal stress of *Caenorhabditis elegans* and epicatechin uptake. *Food Res Int.* 2012; 46: 514–521.
32. Harman D. The biologic clock: the mitochondria? *J Am Geriatr Soc.* 1972; 20: 145–147. PMID: 5016631
33. Gladyshev VN. The free Radical theory of aging is dead. Long live the damage theory! *Antioxid. Redox Signal.* 2014; 20: 727–731. <https://doi.org/10.1089/ars.2013.5228> PMID: 24159899
34. Sanz A. Mitochondrial reactive oxygen species: Do they extend or shorten animal lifespan? *Biochim Biophys Acta.* 2016; 1857: 1116–1126. <https://doi.org/10.1016/j.bbabi.2016.03.018> PMID: 26997500
35. Lee SJ, Hwang AB, Kenyon C. Inhibition of respiration extends *C. elegans* life span via reactive oxygen species that increase HIF-1 activity. *Curr. Biol.* 2010; 20: 2131–2136. <https://doi.org/10.1016/j.cub.2010.10.057> PMID: 21093262
36. Heidler T, Hartwig K, Daniel H, Wenzel U. *Caenorhabditis elegans* lifespan extension caused by treatment with an orally active ROS-generator is dependent on DAF-16 and SIR-2.1. *Biogerontology.* 2010; 11: 183–195. <https://doi.org/10.1007/s10522-009-9239-x> PMID: 19597959
37. Van Raamsdonk JM, Hekimi S. Superoxide dismutase is dispensable for normal animal lifespan. *Proc Natl Acad Sci U S A.* 2012; 109: 5785–90. <https://doi.org/10.1073/pnas.1116158109> PMID: 22451939
38. Meng J, Lv Z, Qiao X, Li X, Li Y, Zhang Y, et al. The decay of Redox-stress Response Capacity is a substantive characteristic of aging: Revising the redox theory of aging. *Redox Biol.* 2017; 11: 365–374. <https://doi.org/10.1016/j.redox.2016.12.026> PMID: 28043053
39. Xiong LG, Chen YJ, Tong JW, Gong YS, Huang JA, Liu ZH. Epigallocatechin-3-gallate promotes healthy lifespan through mitohormesis during early-to-mid adulthood in *Caenorhabditis elegans*. *Redox Biol.* 2017; 14: 305–315. <https://doi.org/10.1016/j.redox.2017.09.019> PMID: 28992589
40. Lapointe J, Stepanyan Z, Bigras E, Hekimi S. Reversal of the mitochondrial phenotype and slow development of oxidative biomarkers of aging in long-lived *Mcl1+/-* Mice. *J Biol Chem.* 2009; 284: 20364–20374. <https://doi.org/10.1074/jbc.M109.006569> PMID: 19478076
41. Desjardins D, Cacho-Valadez B, Liu JL, Wang Y, Yee C, Bernard K, et al. Antioxidants reveal an inverted U-shaped dose-response relationship between reactive oxygen species levels and the rate of aging in *Caenorhabditis elegans*. *Aging Cell.* 2017; 16: 104–112. <https://doi.org/10.1111/ace.12528> PMID: 27683245
42. Mansuri ML, Parihar P, Solanki I, Parihar MS. Flavonoids in modulation of cell survival signalling pathways. *Genes Nutr.* 2014; 9(3): 400. <https://doi.org/10.1007/s12263-014-0400-z> PMID: 24682883
43. Martorell P, Forment JV, de Llanos R, Montón F, Llopis S, González N, et al. Use of *Saccharomyces cerevisiae* and *Caenorhabditis elegans* as model organisms to study the effect of cocoa polyphenols in the resistance to oxidative stress. *J Agric Food Chem.* 2011; 59: 2077–85. <https://doi.org/10.1021/jf104217g> PMID: 21288028
44. Abbas S, Wink M. Epigallocatechin gallate inhibits beta amyloid oligomerization in *Caenorhabditis elegans* and affects the daf-2/insulin-like signalling pathway. *Phytomedicine.* 2010; 17: 902–909. <https://doi.org/10.1016/j.phymed.2010.03.008> PMID: 20382008
45. Bonomo LdeF, Silva DN, Boasquivis PF, Paiva FA, Guerra JF, Martins TA, et al. Açai (*Euterpe oleracea* Mart.) modulates oxidative stress resistance in *Caenorhabditis elegans* by direct and indirect mechanisms. *PLoS One.* 2014; 9(3): e89933. <https://doi.org/10.1371/journal.pone.0089933> PMID: 24594796
46. Saul N, Pietsch K, Menzel R, Stürzenbaum SR, Steinberg CE. Catechin induced longevity in *C. elegans*: from Key regulator genes to disposable soma. *Mech Ageing Dev.* 2009; 130: 447–486.
47. Cai WJ, Huang JH, Zhang SQ, Wu B, Kapahi P, Zhang XM, et al. Icarin and its derivative icaraside II extend healthspan via insulin/IGF-1 pathway in *C. elegans*. *PLoS One.* 2011; 6(12): e28835. <https://doi.org/10.1371/journal.pone.0028835> PMID: 22216122
48. Zheng SQ, Huang XB, Xing TK, Ding AJ, Wu GS, Luo HR. Chlorogenic Acid Extends the Lifespan of *Caenorhabditis elegans* via Insulin/IGF-1 Signaling Pathway. *J Gerontol A Biol Sci Med Sci.* 2017; 72: 464–472. <https://doi.org/10.1093/gerona/glw105> PMID: 27378235
49. Saul N, Pietsch K, Menzel R, Steinberg CE. Quercetin-mediated longevity in *C. elegans*: Is DAF-16 involved? *Mech Ageing Dev.* 2008; 129: 611–613. <https://doi.org/10.1016/j.mad.2008.07.001> PMID: 18692520

50. Furuyama T, Nakazawa T, Nakano I, Mori N. Identification of the differential distribution patterns of mRNAs and consensus binding sequences for mouse DAF-16 homologues. *Biochem J.* 2000; 349: 629–634. PMID: [10880363](https://pubmed.ncbi.nlm.nih.gov/10880363/)
51. Kahn NW, Rea SL, Moyle S, Kell A, Johnson TE. Proteasomal dysfunction activates the transcription factor SKN-1 and produces a selective oxidative-stress response in *Caenorhabditis elegans*. *Biochem J.* 2008; 409: 205–13. <https://doi.org/10.1042/BJ20070521> PMID: [17714076](https://pubmed.ncbi.nlm.nih.gov/17714076/)
52. Van Raamsdonk JM, Hekimi S. Reactive Oxygen Species and Aging in *Caenorhabditis elegans*: Causal or Causal Relationship? *Antioxidants & Redox.* 2010; 13: 1911–1953.
53. Bahia PK, Rattray M, Williams R. J. Dietary flavonoid (–)epicatechin stimulates phosphatidylinositol 3-kinase-dependent anti-oxidant response element activity and up-regulates glutathione in cortical astrocytes. *J. Neurochem.* 2008; 106: 2194–2204. <https://doi.org/10.1111/j.1471-4159.2008.05542.x> PMID: [18624917](https://pubmed.ncbi.nlm.nih.gov/18624917/)
54. Granado-Serrano AB, Martin MA, Haegeman G, Goya L, Bravo L, Ramos S. Epicatechin induces NF- $\kappa$ B, activator protein-1 (AP-1) and nuclear transcription factor erythroid 2p45-related factor-2 (Nrf2) via phosphatidylinositol-3-kinase/protein kinase B (PI3K/ AKT) and extracellular regulated kinase (ERK) signalling in HepG2 cells. *Br. J. Nutr.* 2010; 103: 168–79. <https://doi.org/10.1017/S0007114509991747> PMID: [20030899](https://pubmed.ncbi.nlm.nih.gov/20030899/)
55. Miranda-Vizuete A, Veal EA. *Caenorhabditis elegans* as a model for understanding ROS function in physiology and disease. *Redox Biol.* 2017; 11: 708–714. <https://doi.org/10.1016/j.redox.2016.12.020> PMID: [28193593](https://pubmed.ncbi.nlm.nih.gov/28193593/)
56. Tullet JMA, Green JW, Au C, Benedetto A, Thompson MA, Clark E, et al. The SKN-1/Nrf2 transcription factor can protect against oxidative stress and increase lifespan in *C. elegans* by distinct mechanisms. *Aging Cell.* 2017; 16: 1191–1194. <https://doi.org/10.1111/accel.12627> PMID: [28612944](https://pubmed.ncbi.nlm.nih.gov/28612944/)
57. Rea SL, Wu D, Cypser JR, Vaupel JW, Thomas EJ. A Stress-Sensitive Reporter Predicts Longevity in Isogenic Populations of *Caenorhabditis elegans*. *Nat. Genet.* 2005; 37: 894–898. <https://doi.org/10.1038/ng1608> PMID: [16041374](https://pubmed.ncbi.nlm.nih.gov/16041374/)
58. Upadhyay A; Chompoo J, Taira N, Fukuta M, Tawata S. Significant longevity-extending effects of *Alpinia zerumbet* leaf extract on the life span of *Caenorhabditis elegans*. *Biosci Biotechnol Biochem.* 2013; 77: 217–223. <https://doi.org/10.1271/bbb.120351> PMID: [23391900](https://pubmed.ncbi.nlm.nih.gov/23391900/)
